# Supplementary material
Source: PubMed Central journal article supplement (PMC3129202)
Supplement: supp_M111.226142_jbc.M111.226142-1.pdf [file supp_M111.226142_jbc.M111.226142-1.pdf]

## SUPPLEMENTAL DATA

### Determination of the structure of human CLEC5A by multi-step molecular replacement.

The data were processed using the HKL2000 software package in the  $P3$  space group,  $a=b=109.1$  Å  $c=84.9$  Å (1). The systematic absences suggested that the true space group was either  $P3_1$  or  $P3_2$ . There was a strong non-origin peak in the Patterson map with a height of 0.23 relative to the height of the origin peak. This peak corresponded to the pseudotranslation  $(a-b)/3$ . A "sigmoidal" shape of the cumulative intensity distribution for acentric reflections suggested the possibility of twinning. This criterion of twinning remains valid even in the presence of pseudotranslation (2). The data were further analyzed using *SFHECK* (3). The data in the resolution range 10 to 3.3 Å had completeness of 99.5 % and  $R_{\text{merge}}$  less than 0.1 and were therefore used in the partial twinning test (H-test) (4). This test confirmed the presence of partial merohedral twinning with a twinning fraction of approximately 0.2 and with the twin operator  $-h, h+k, -l$ . The self-rotation function (SRF) was computed using MOLREP (5). The SRF-peak corresponding to the twin operation ( $\lambda = 90^\circ$ ,  $\mu = 90^\circ$ ,  $\nu = 180^\circ$ ) had a height of 0.84 relative to the height of the crystallographic peak. Such a large correlation between twin-related intensities could not be explained by partial twinning with a twinning fraction of 0.2 and suggested the presence of a non-crystallographic symmetry axis aligned with the twin axis. Altogether, the above considerations suggested that the structure of a twin individual or of its substructure had pseudosymmetry  $P3_121$  or  $P3_221$  with the translation basis  $(a-b)/3$ ,  $(a+2b)/3$ ,  $c$ .

Several cases of pseudosymmetry in  $P3_1$  and  $P3_2$  structures have been reported. For example, Lee et al. described a twinned  $P3_2$  structure of superoxide dismutase (PDB:1P7G) with 24 molecules per asymmetric unit which had pseudosymmetry  $P3_121$  with the translation basis  $(a-b)/3$ ,  $(a+2b)/3$ ,  $c/2$  and in which three equivalent twin axes were parallel to the two-fold axes of the pseudosymmetry space group (2). Another example, the structure of iron-binding protein (PDB code 1O7T) had symmetry  $P3_2$  and 9 molecules in the asymmetric unit (6). Only a substructure with 6 out of 9 molecules in the asymmetric unit was pseudosymmetric in this case, the pseudosymmetry being  $P3_221$  with basis vectors  $(a-b)/3$ ,  $(a+2b)/3$  and  $c$ . The latter example seemed most relevant to our case, as 9 molecules in the asymmetric unit in our crystal would correspond to a solvent content of 50 %.

The structure of CLEC5A was solved using the following modes of the molecular replacement (MR) program MOLREP: (i) the conventional search with the fast rotation function (RF) and the fast translation function (TF), (ii) the fast RF against modified structure factors followed by the phased translation function (PTF), and (iii) spherically averaged phased translation function (SAPTF) followed by phased rotation function (PRF) and validated using PTF (5-7). Phases in modes (ii) and (iii) were from the partial solution found in the preceding step of MR and refined using REFMAC (10). Modified structure amplitudes in the mode (ii) were from the REFMAC 2Fo-Fc map, in which the modeled part was masked using the partial structure.

A monomer of human CD94 protein (PDB code 3BDW) bearing 26 % identity with the CLEC5A target sequence, was adjusted to fit the target sequence using BALBES, and was subsequently used as the search model for this multi-protocol molecular replacement (8,9). Protocol (i) permitted the assignment of the space group  $P3_1$ , and the positioning of molecules A to C (molecules are referred to by their chain identifier in the model deposited with the PDB). Molecules D and E were found using protocol (ii). The structure A-D possessed  $P3_121$  pseudosymmetry with translation vectors  $(2a+b)/3$ ,  $(-a+b)/3$  and  $c$ .

Refinement of the structure at this stage resulted in an R-factor of 46.4 % and R-free of 49.6 %. Further attempts using protocol (i) failed to find more molecules, suggesting that a careful analysis of pseudosymmetry was required. Supplementary Figure 1 shows that a putative crystal with a small unit cell belonging to the pseudosymmetry space group  $P3_121$  possesses three times more three-fold axes than the actual  $P3_1$  crystal with a large unit-cell. One third of all three-fold axes of a pseudosymmetry space group are crystallographic axes and the remaining two thirds represent non-crystallographic symmetry axes in a crystallographic space group with the large unit cell. The choice of a different crystallographic axis defines three different non-equivalent subgroups of

the pseudosymmetry space group and, therefore, three different  $P3_1$  structures. Because the three structures can only differ by minor perturbations of the higher order symmetry, the TF cannot select the correct structure from the three possibilities. Therefore, all three possible structures were generated and refined using REFMAC to give  $R_{\text{crist}}/R_{\text{free}}$  of 46.0/49.8 for the original MR solution, as compared with 45.9/49.5 and 43.0/46.6 for the alternative structures. The second of the two alternative structures was chosen and used in further MR trials with protocol (ii) to find molecules G and H. No further molecules were identified by this method, but an inspection of the electron density map after refinement of the substructure A-H revealed clear density allowing the positioning of one last molecule, I, using the method (iii).

### **CLEC5A BRET experiment fusion protein constructs.**

Two plasmids were constructed, one encoding CLEC5A with GFP fused to its N-terminus and one encoding CLEC5A with luciferase fused to its N-terminus. This BRET pair of CLEC5A fusion proteins was used to transfect HEK 293T cells. Following transfection, the natural full-length CLEC5A fusion proteins were detected at the cell surface at a substantially reduced density compared to their unfused counterparts, such that BRET studies were not possible. As the predicted CLEC5A cytoplasmic domain is only 4 amino acids in length, we hypothesized that the very close proximity of the fused domain (GFP or luciferase) to the plasma membrane was detrimental to the stability of the fusion protein. Therefore, an additional BRET pair of constructs was generated (Supplementary Figure 2), in which the natural, short cytoplasmic sequence of CLEC5A (residues 1-4) was replaced with the slightly longer CLEC-2 cytoplasmic domain (residues 1-32). There is no evidence to suggest that the cytoplasmic domain of CLEC-2 contributes to CLEC-2 dimerization and we have shown that the extracellular domain of CLEC-2 dimerizes in the absence of this domain (10). For all experiments documented in the main body of the manuscript, unless otherwise stated, Construct 2 (Supplementary Figure 2) was used, in which the natural, short cytoplasmic sequence of CLEC5A (residues 1-4) was replaced with the CLEC-2 cytoplasmic domain (residues 1-32).

### **CLEC5A glycan microarray analysis.**

#### *Neoglycolipid-based microarray analyses*

Recombinant monomeric CLEC5A protein was biotinylated on an N-terminal tag using the enzyme BirA (11), and oligomerized, by pre-complexing with Alexa Fluor 647-labelled streptavidin. The microarrays contained 452 lipid-linked oligosaccharide probes, neoglycolipids and glycolipids (Supplementary Table 1), printed non-covalently onto nitrocellulose-coated glass slides at 2 and 7 fmol/spot, and microarray analyses were performed as described for Dectin-1 (12). Several conditions for the CLEC5A binding assay were investigated, such as the protein concentration, blocking and diluent solutions. The data presented are representative of results from assay conditions that gave the smoothest background. In brief, the arrayed slides were blocked with 1 % casein (Pierce, Thermo Scientific, Rockford, IL) in 10 mM Tris-HCl buffer, pH 7.4, containing 5 mM  $\text{CaCl}_2$  and 150 mM NaCl and overlaid for 2 h with labelled CLEC5A (10  $\mu\text{g}/\text{mL}$  in blocker solution) at ambient temperature. Data analysis and presentation was performed with dedicated software developed by Mark S. Stoll of the Glycosciences Laboratory (13). Results at 7 fmol/spot are illustrated. None of the probes in the array gave binding signals with CLEC5A (Figure 4B).

#### *CFG Glycan microarray analysis*

Recombinant CLEC5A (amino acids 71-187) tagged on its N-terminus with a BirA recognition sequence was biotinylated, and oligomerized by pre-complexing with neutravidin-FITC to test binding to a panel of 406 natural and synthetic oligosaccharide probes printed covalently onto N-hydroxysuccinimide-activated glass slides (printed array version 3.2) assembled by the Consortium for Functional Glycomics (CFG) core H microarrays (US). Labelled CLEC5A was diluted to 200  $\mu\text{g}/\text{mL}$  in 20 mM Tris-HCl, pH 7.4, 150 mM NaCl, 2 mM  $\text{CaCl}_2$ , 2 mM  $\text{MgCl}_2$ , 0.05 % Tween 20, 1 % BSA, and

70  $\mu$ L of this solution was applied to the printed surface and coverslipped. The slide was incubated in a humidified chamber at room temperature for 1 hour. This slide was washed for 10 seconds each in 20 mM Tris-HCl, pH 7.4, 150 mM NaCl 2 mM CaCl<sub>2</sub>, 2 mM MgCl<sub>2</sub>, 0.05 % Tween 20, then 20 mM Tris-HCl, pH 7.4, 150 mM NaCl 2 mM CaCl<sub>2</sub>, 2 mM MgCl<sub>2</sub>, and then in deionized water and was subsequently dried under a stream of nitrogen. The binding image was read in a Perkin Elmer Microscanarray XL4000 scanner and results were uploaded to the Consortium database (<http://www.functionalglycomics.org>). The glycan-related probes and their spacers are given in Supplementary Table 2. No specific binding signals were observed with CLEC5A (Figure 4C).

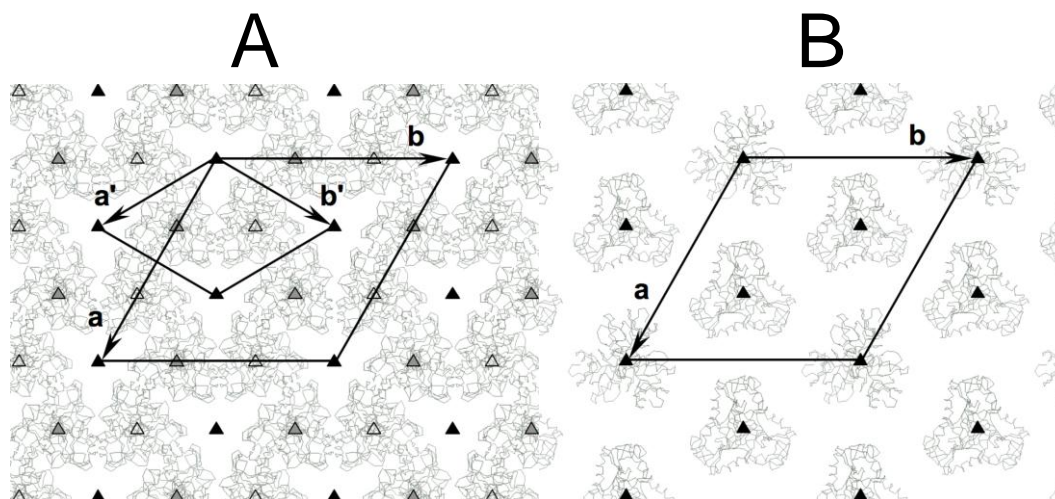

### Supplementary Figure 1. Organisation of the CLEC5A protein crystal.

$\alpha$  traces in the background show the substructures generated by crystallographic symmetry from molecules (A) A to F and (B) H to I. Crystallographic  $3_1$  axes are shown by black triangles and pseudosymmetry  $3_1$  axes are shown by grey and open triangles. Crystallographic translations  $a$  and  $b$  and pseudotranslations  $a' = (a-b)/3$  and  $b' = (a+2b)/3$  are shown by arrows. The whole structure belongs to the space group  $P3_1$ . The substructure in (A) has pseudosymmetry  $P3_121$  with translation basis  $a'$ ,  $b'$ . In the false MR solution for the molecules A to F the origin was located on one of the non-crystallographic symmetry axes shown by open triangles and, accordingly, all these axes were treated as crystallographic in the subsequent molecular replacement search for molecules G to I. The substructure G to I (B) is not symmetric relative to the rotations about these axes and therefore it could not be solved until the position of origin in the substructure (A) was corrected.

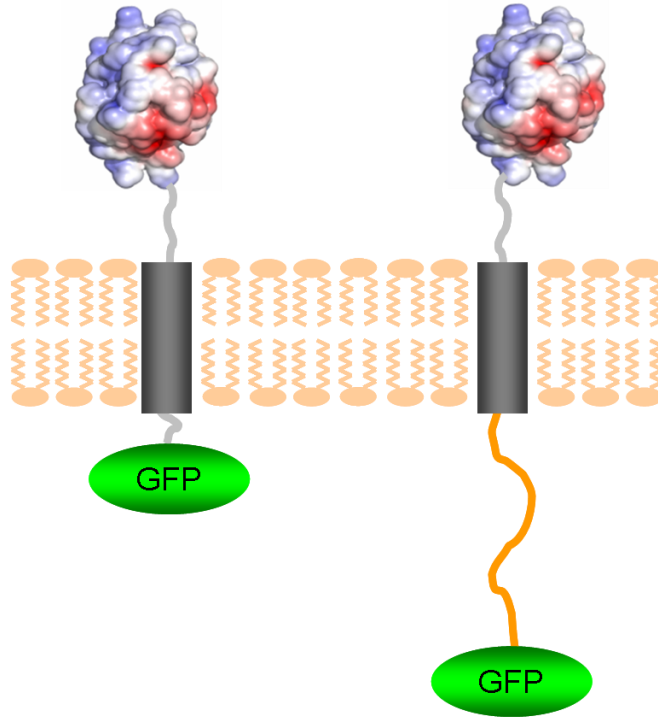

|                     |         | Construct 1 |        |        | Construct 2 |        |        |
|---------------------|---------|-------------|--------|--------|-------------|--------|--------|
|                     |         | EC          | TM     | IC     | EC          | TM     | IC     |
|                     |         | CLEC5A      | CLEC5A | CLEC5A | CLEC5A      | CLEC5A | CLEC-2 |
| BRET <sub>max</sub> | + DAP12 | 0           |        |        | 0.204       |        |        |
|                     | - DAP12 | 0           |        |        | 0.208       |        |        |

**Supplementary Figure 2. CLEC5A BRET constructs.**

CLEC5A fusion constructs used for BRET. CLEC5A segments are colored grey, CLEC-2 segments are colored yellow. The GFP portion of the fusion protein is shown in green. Equivalent constructs were used for the luciferase fusion proteins in each BRET pair. The table indicates the BRET<sub>max</sub> for the BRET pairs of each of these constructs, where the experiments were performed in the absence and presence of DAP12. EC: extracellular, TM: transmembrane, IC: intracellular.

| Pos <sup>a</sup>                             | Probe <sup>b</sup>  | Sequence                                                              | Fluorescence |
|----------------------------------------------|---------------------|-----------------------------------------------------------------------|--------------|
| <b>Lactose and N-acetyllactosamine-based</b> |                     |                                                                       |              |
| 1                                            | Galactocerebrosides | Gal $\beta$ -Cer                                                      | -            |
| 2                                            | H-Di                | Fuc $\alpha$ -2Gal                                                    | -            |
| 3                                            | A-Tri               | GalNAc $\alpha$ -3Gal<br> <br>Fuc $\alpha$ -2                         | -            |
| 4                                            | B-Tri               | Gal $\alpha$ -3Gal<br> <br>Fuc $\alpha$ -2                            | -            |
| 5                                            | GSC-426             | 3-deoxy, 3-carboxymethyl-Gal $\beta$ -C30                             | -            |
| 6                                            | Sulfatide           | SU-3Gal $\beta$ -Cer                                                  | -            |
| 7                                            | GSF-1               | SU-3Gal $\beta$ -C30                                                  | 5            |
| 8                                            | GSC-209             | GlcA $\beta$ -3Gal $\beta$ -Cer42                                     | -            |
| 9                                            | GSC-210             | SU-3GlcA $\beta$ -3Gal $\beta$ -Cer42                                 | -            |
| 10                                           | GSC-187             | NeuAc $\alpha$ -3Gal $\beta$ -C29                                     | -            |
| 11                                           | GSC-40              | NeuAc $\alpha$ - (S) -3Gal $\beta$ -Cer42                             | -            |
| 12                                           | GSC-230             | NeuAc $\alpha$ -8NeuAc $\alpha$ -3Gal $\beta$ -Cer36                  | -            |
| 13                                           | GSC-27              | NeuAc $\alpha$ -6Gal $\beta$ -Cer36                                   | -            |
| 14                                           | GSC-144             | KDN $\alpha$ -6Gal $\beta$ -Cer36                                     | -            |
| 15                                           | GSC-13              | NeuAc $\alpha$ - (S) -6Gal $\beta$ -Cer36                             | -            |
| 16                                           | GSC-72              | NeuAc $\alpha$ - (S) -6Gal $\beta$ - (S) -Cer36                       | -            |
| 17                                           | GSC-231             | NeuAc $\alpha$ -8NeuAc $\alpha$ -6Gal $\beta$ -Cer36                  | 8            |
| 18                                           | GSC-439             | NeuAc $\alpha$ -8NeuAc $\alpha$ -8NeuAc $\alpha$ -6Gal $\beta$ -Cer36 | 2            |
| 19                                           | Glucocerebrosides   | Glc $\beta$ -Cer?                                                     | 7            |
| 20                                           | GSF-19              | SU-6Glc $\beta$ -C30                                                  | -            |
| 21                                           | GSC-60              | NeuAc $\alpha$ -6Glc $\beta$ -Cer36                                   | -            |
| 22                                           | GSC-9               | NeuAc $\alpha$ - (S) -6Glc $\beta$ -Cer36                             | -            |
| 23                                           | GSC-62              | NeuAc $\alpha$ -2Glc $\beta$ -Cer36                                   | -            |
| 24                                           | GSC-59              | NeuAc $\alpha$ -6GlcNAc $\beta$ -Cer36                                | -            |
| 25                                           | GSC-95              | NeuAc $\alpha$ - (S) -6GlcNAc $\beta$ -Cer36                          | -            |
| 26                                           | GSC-232             | NeuAc $\alpha$ -8NeuAc $\alpha$ -6Glc $\beta$ -Cer36                  | -            |
| 27                                           | Lactocerebrosides   | Gal $\beta$ -4Glc $\beta$ -Cer                                        | -            |
| 28                                           | Lac                 | Gal $\beta$ -4Glc                                                     | -            |
| 29                                           | Lac-AO              | Gal $\beta$ -4Glc-AO                                                  | -            |

|    |                                     |                                                                                     |    |
|----|-------------------------------------|-------------------------------------------------------------------------------------|----|
| 30 | GSC-432                             | 3-deoxy, 3-carboxymethyl-Gal $\beta$ -4Glc $\beta$ -C30                             | -  |
| 31 | GSC-296                             | GlcA $\beta$ -3Gal $\beta$ -4Glc $\beta$ -C30                                       | -  |
| 32 | GSC-353                             | SU-3GlcA $\beta$ -3Gal $\beta$ -4Glc $\beta$ -C30                                   | -  |
| 33 | GalNAc $\alpha$ -3Gal $\beta$ -4Glc | GalNAc $\alpha$ -3Gal $\beta$ -4Glc                                                 | -  |
| 34 | Ceramide trihexoside                | Gal $\alpha$ -4Gal $\beta$ -4Glc $\beta$ -Cer                                       | -  |
| 35 | Globoside (P-antigen)               | GalNAc $\beta$ -3Gal $\alpha$ -4Gal $\beta$ -4Glc $\beta$ -Cer                      | -  |
| 36 | Forssmann glycolipid                | GalNAc $\alpha$ -3GalNAc $\beta$ -3Gal $\alpha$ -4Gal $\beta$ -4Glc $\beta$ -Cer    | -  |
| 37 | GSC-430                             | 3-deoxy, 3-carboxymethyl-Gal $\beta$ -3Glc $\beta$ -C30<br>Fuca-4                   | -  |
| 38 | GSC-260                             | 3-deoxy, 3-carboxymethyl-Gal $\beta$ -4Glc $\beta$ -C30<br>Fuca-3                   | -  |
| 39 | GSC-150                             | SU-3Gal $\beta$ -4Glc $\beta$ -C30<br>Fuca-3                                        | -  |
| 40 | NeuAc $\alpha$ -(3')Lac             | NeuAc $\alpha$ -3Gal $\beta$ -4Glc                                                  | -  |
| 41 | NeuAc $\alpha$ -(3')Lac-AO          | NeuAc $\alpha$ -3Gal $\beta$ -4Glc-AO                                               | -  |
| 42 | Neu4,5Ac-(3')Lac                    | Neu4,5Ac $\alpha$ -3Gal $\beta$ -4Glc                                               | -  |
| 43 | Neu4,5Ac-(3')Lac-AO                 | Neu4,5Ac $\alpha$ -3Gal $\beta$ -4Glc-AO                                            | -  |
| 44 | GSC-16                              | NeuAc $\alpha$ -3Gal $\beta$ -4Glc $\beta$ -Cer32                                   | -  |
| 45 | GSC-178                             | NeuAc $\alpha$ -3Gal $\beta$ -4Glc $\beta$ -Cer34                                   | -  |
| 46 | GSC-17                              | NeuAc $\alpha$ -3Gal $\beta$ -4Glc $\beta$ -Cer36                                   | -  |
| 47 | GSC-18                              | NeuAc $\alpha$ -3Gal $\beta$ -4Glc $\beta$ -Cer42                                   | -  |
| 48 | GSC-197                             | KDN $\alpha$ -3Gal $\beta$ -4Glc $\beta$ -Cer28                                     | 4  |
| 49 | GSC-199                             | KDN $\alpha$ -3Gal $\beta$ -4Glc $\beta$ -C30                                       | -  |
| 50 | GSC-198                             | KDN $\alpha$ -3Gal $\beta$ -4Glc $\beta$ -Cer34                                     | -  |
| 51 | GSC-75                              | (4-deoxy) NeuAc $\alpha$ -3Gal $\beta$ -4Glc $\beta$ -Cer36                         | -  |
| 52 | GSC-76                              | (7-deoxy) NeuAc $\alpha$ -3Gal $\beta$ -4Glc $\beta$ -Cer36                         | 20 |
| 53 | GSC-77                              | (8-deoxy) NeuAc $\alpha$ -3Gal $\beta$ -4Glc $\beta$ -Cer36                         | -  |
| 54 | GSC-153                             | (4,8-deoxy) NeuAc $\alpha$ -3Gal $\beta$ -4Glc $\beta$ -Cer36                       | -  |
| 55 | GSC-51                              | (9-deoxy) NeuAc $\alpha$ -3Gal $\beta$ -4Glc $\beta$ -Cer36                         | -  |
| 56 | GSC-78                              | (4-OMe) NeuAc $\alpha$ -3Gal $\beta$ -4Glc $\beta$ -Cer36                           | -  |
| 57 | GSC-79                              | (9-OMe) NeuAc $\alpha$ -3Gal $\beta$ -4Glc $\beta$ -Cer36                           | -  |
| 58 | GSC-23                              | (C7) NeuAc $\alpha$ -3Gal $\beta$ 1-4Glc $\beta$ -Cer36                             | -  |
| 59 | GSC-24                              | (C8) NeuAc $\alpha$ -3Gal $\beta$ 1-4Glc $\beta$ -Cer36                             | -  |
| 60 | GSC-50                              | (C8 diastereoisomer) NeuAc $\alpha$ -3Gal $\beta$ -4Glc $\beta$ -Cer36              | -  |
| 61 | GSC-229                             | NeuAc $\alpha$ -8NeuAc $\alpha$ -3Gal $\beta$ -4Glc $\beta$ -Cer36                  | -  |
| 62 | GSC-96                              | NeuAc $\alpha$ -9NeuAc $\alpha$ -3Gal $\beta$ -4Glc $\beta$ -Cer36                  | -  |
| 63 | GSC-437                             | NeuAc $\alpha$ -8NeuAc $\alpha$ -8NeuAc $\alpha$ -3Gal $\beta$ -4Glc $\beta$ -Cer36 | -  |

|    |                                     |                                                                           |    |
|----|-------------------------------------|---------------------------------------------------------------------------|----|
| 64 | Neu $\alpha$ -(3')Lac               | Neu $\alpha$ -3Gal $\beta$ -4Glc                                          | 8  |
| 65 | Neu $\alpha$ -(3')Lac-AO            | Neu $\alpha$ -3Gal $\beta$ -4Glc-AO                                       | 1  |
| 66 | NeuAc $\alpha$ -(6')Lac             | NeuAc $\alpha$ -6Gal $\beta$ -4Glc                                        | -  |
| 67 | NeuAc $\alpha$ -(6')Lac-AO          | NeuAc $\alpha$ -6Gal $\beta$ -4Glc-AO                                     | 2  |
| 68 | GSC-61                              | NeuAc $\alpha$ -6Gal $\beta$ -4Glc $\beta$ -Cer36                         | -  |
| 69 | GSC-12                              | NeuAc $\alpha$ -(S)-6Gal $\beta$ -4Glc $\beta$ -Cer36                     | -  |
| 70 | GSC-234                             | NeuAc $\alpha$ -(S)-6Gal(S) $\beta$ -4Glc $\beta$ -Cer36                  | 3  |
| 71 | GSC-73                              | NeuAc $\alpha$ -(S)-6Gal $\beta$ -4Glc $\beta$ -(S)-Cer36                 | -  |
| 72 | Neu $\alpha$ -(6')Lac               | Neu $\alpha$ -6Gal $\beta$ -4Glc                                          | 8  |
| 73 | Neu $\alpha$ -(6')Lac-AO            | Neu $\alpha$ -6Gal $\beta$ -4Glc-AO                                       | -  |
| 74 | NeuAc $\beta$ -(3')Lac              | NeuAc $\beta$ -3Gal $\beta$ -4Glc                                         | -  |
| 75 | NeuAc $\beta$ -(3')Lac-AO           | NeuAc $\beta$ -3Gal $\beta$ -4Glc-AO                                      | -  |
| 76 | NeuAc $\beta$ -(6')Lac              | NeuAc $\beta$ -6Gal $\beta$ -4Glc                                         | -  |
| 77 | NeuAc $\beta$ -(6')Lac-AO           | NeuAc $\beta$ -6Gal $\beta$ -4Glc-AO                                      | -  |
| 78 | GSC-161                             | NeuAc $\alpha$ -3Gal $\beta$ -4Glc $\beta$ -C30<br> <br>Fuc $\alpha$ -3   | 11 |
| 79 | GSC-162                             | NeuAc $\alpha$ -3Gal $\beta$ -4Glc $\beta$ -Cer36<br> <br>Fuc $\alpha$ -3 | -  |
| 80 | LacNAc(1-3)                         | Gal $\beta$ -3GlcNAc                                                      | -  |
| 81 | LacNAc(1-3)-AO                      | Gal $\beta$ -3GlcNAc-AO                                                   | 3  |
| 82 | LacNAc                              | Gal $\beta$ -4GlcNAc                                                      | -  |
| 83 | LacNAc-AO                           | Gal $\beta$ -4GlcNAc-AO                                                   | -  |
| 84 | Gal $\alpha$ -4Gal $\beta$ -4GlcNAc | Gal $\alpha$ -4Gal $\beta$ -4GlcNAc                                       | -  |
| 85 | SU(3')-LN                           | SU-3Gal $\beta$ -4GlcNAc                                                  | -  |
| 86 | Lea-Tri                             | Gal $\beta$ -3GlcNAc<br> <br>Fuc $\alpha$ -4                              | 7  |
| 87 | Lea-Tri-AO                          | Gal $\beta$ -3GlcNAc-AO<br> <br>Fuc $\alpha$ -4                           | -  |
| 88 | Lex-Tri                             | Gal $\beta$ -4GlcNAc<br> <br>Fuc $\alpha$ -3                              | -  |
| 89 | Lex-Tri-AO                          | Gal $\beta$ -4GlcNAc-AO<br> <br>Fuc $\alpha$ -3                           | -  |
| 90 | Lex-Tri-(Me)AO                      | Gal $\beta$ -4GlcNAc-(Me)AO<br> <br>Fuc $\alpha$ -3                       | -  |



|                                                              |                           |                                                                                            |    |
|--------------------------------------------------------------|---------------------------|--------------------------------------------------------------------------------------------|----|
| 91                                                           | SU(3')-Lea-Tri            | SU-3Gal $\beta$ -3GlcNAc<br> <br>Fuca-4                                                    | -  |
| 92                                                           | SU(3')-Lex-Tri            | SU-3Gal $\beta$ -4GlcNAc<br> <br>Fuca-3                                                    | -  |
| 93                                                           | NeuAc $\alpha$ -(3')LN    | NeuAc $\alpha$ -3Gal $\beta$ -4GlcNAc                                                      | -  |
| 94                                                           | NeuAc $\alpha$ -(3')LN-AO | NeuAc $\alpha$ -3Gal $\beta$ -4GlcNAc-AO                                                   | -  |
| 95                                                           | PI-1                      | NeuAc $\alpha$ -3(6-NAc)Gal $\beta$ -4GlcNAc                                               | -  |
| 96                                                           | PI-1-AO                   | NeuAc $\alpha$ -3(6-NAc)Gal $\beta$ -4GlcNAc-AO                                            | -  |
| 97                                                           | PI-2                      | NeuAc $\alpha$ -3(6-NBz)Gal $\beta$ -4GlcNAc                                               | -  |
| 98                                                           | PI-2-AO                   | NeuAc $\alpha$ -3(6-NBz)Gal $\beta$ -4GlcNAc-AO                                            | -  |
| 99                                                           | NeuAc $\alpha$ -(6')LN    | NeuAc $\alpha$ -6Gal $\beta$ -4GlcNAc                                                      | -  |
| 100                                                          | Neu5,9Ac-(6')LN           | Neu5,9Ac $\alpha$ -6Gal $\beta$ -4GlcNAc                                                   | -  |
| 101                                                          | SA(3')-Lea-Tri            | NeuAc $\alpha$ -3Gal $\beta$ -3GlcNAc<br> <br>Fuca-4                                       | -  |
| 102                                                          | GSC-440                   | NeuAc $\alpha$ -3Gal $\beta$ -4GlcNAc $\beta$ -C30<br> <br>Fuca-3                          | -  |
| 103                                                          | GSC-512                   | Neu4,5Ac $\alpha$ -3Gal $\beta$ -4GlcNAc $\beta$ -C30<br> <br>Fuca-3                       | -  |
| 104                                                          | GSC-513                   | Neu5,9Ac $\alpha$ -3Gal $\beta$ -3GlcNAc $\beta$ -C30<br> <br>Fuca-4                       | -  |
| 105                                                          | GSC-511                   | Neu5,9Ac $\alpha$ -3Gal $\beta$ -4GlcNAc $\beta$ -C30<br> <br>Fuca-3                       | -  |
| <b><i>Lacto-N-neotetraose and Lacto-N tetraose-based</i></b> |                           |                                                                                            |    |
| 106                                                          | GSC-225                   | (3-carboxymethyl)Gal $\beta$ -4GlcNAc $\beta$ -3Gal $\beta$ -Cer36<br> <br>Fuca-3          | 10 |
| 107                                                          | GSC-236                   | SU3<br> <br>Gal $\beta$ -4GlcNAc $\beta$ -3Gal $\beta$ -C30<br> <br>Fuca-3                 | -  |
| 108                                                          | GSC-479                   | NeuAc $\alpha$ -3Gal $\beta$ -4GlcNAc $\beta$ -3Gal $\beta$ -C30<br> <br>Fuca-3            | -  |
| 109                                                          | GSC-105                   | NeuAc $\alpha$ -3Gal $\beta$ -4GlcNAc $\beta$ -3Gal $\beta$ -Cer36<br> <br>Fuca-3          | -  |
| 110                                                          | GSC-121                   | NeuAc $\alpha$ -3Gal $\beta$ -4GlcNAc $\beta$ -3Gal $\beta$ -Cer36<br> <br>(3-deoxy)Fuca-3 | -  |

|     |                          |                                                                                                        |     |
|-----|--------------------------|--------------------------------------------------------------------------------------------------------|-----|
| 111 | GSC-123                  | NeuAc $\alpha$ -3Gal $\beta$ -4GlcNAc $\beta$ -3Gal $\beta$ -Cer36<br> <br>(4-deoxy) Fuca-3            | 19  |
| 112 | GSC-133                  | NeuAc $\alpha$ -3Gal $\beta$ -4GlcNAc $\beta$ -3Gal $\beta$ -Cer36<br> <br>(2-OMe) Fuca-3              | 9   |
| 113 | GSC-131                  | NeuAc $\alpha$ -3Gal $\beta$ -4GlcNAc $\beta$ -3Gal $\beta$ -Cer36<br> <br>Quva-3                      | -   |
| 114 | GSC-163                  | NeuAc $\alpha$ -3Gal $\beta$ -4GlcNAc $\beta$ -3Gal $\beta$ -Cer36<br> <br>Rha $\alpha$ -3             | -   |
| 115 | GSC-127                  | NeuAc $\alpha$ -3Gal $\beta$ -4GlcNAc $\beta$ -3Gal $\beta$ -Cer36<br> <br>(6-deoxy) L-Tal $\alpha$ -3 | 15  |
| 116 | GSC-341                  | KDN $\alpha$ -3Gal $\beta$ -4GlcNAc $\beta$ -3Gal $\beta$ -C30<br> <br>Fuca-3                          | -   |
| 117 | GSC-177                  | NeuGca-3Gal $\beta$ -4GlcNAc $\beta$ -3Gal $\beta$ -Cer36<br> <br>Fuca-3                               | -   |
| 118 | GSC-175                  | NeuAc $\alpha$ -3(4-deoxy) Gal $\beta$ -4GlcNAc $\beta$ -3Gal $\beta$ -Cer36<br> <br>Fuca-3            | 2   |
| 119 | GSC-257                  | NeuAc $\alpha$ -3(4,6-deoxy) Gal $\beta$ -4GlcNAc $\beta$ -3Gal $\beta$ -Cer36<br> <br>Fuca-3          | 2   |
| 120 | DLNN                     | GlcNAc $\beta$ -3Gal $\beta$ -4Glc                                                                     | 140 |
| 121 | LNT                      | Gal $\beta$ -3GlcNAc $\beta$ -3Gal $\beta$ -4Glc                                                       | -   |
| 122 | Paragloboside            | Gal $\beta$ -4GlcNAc $\beta$ -3Gal $\beta$ -4Glc $\beta$ -Cer                                          | -   |
| 123 | LNnT                     | Gal $\beta$ -4GlcNAc $\beta$ -3Gal $\beta$ -4Glc                                                       | -   |
| 124 | B-like pentaosylceramide | Gal $\alpha$ -3Gal $\beta$ -4GlcNAc $\beta$ -3Gal $\beta$ -4Glc $\beta$ -Cer                           | -   |
| 125 | Klaus glycolipid         | Gal $\beta$ -3Gal $\beta$ -4GlcNAc $\beta$ -3Gal $\beta$ -4Glc $\beta$ -Cer                            | -   |
| 126 | GSC-207                  | GlcA $\beta$ -3Gal $\beta$ -4GlcNAc $\beta$ -3Gal $\beta$ -4Glc $\beta$ -C30                           | -   |
| 127 | GSC-191                  | GlcA $\beta$ -3Gal $\beta$ -4GlcNAc $\beta$ -3Gal $\beta$ -4Glc $\beta$ -Cer36                         | -   |
| 128 | GSC-189                  | GlcA $\beta$ -3Gal $\beta$ -4GlcNAc $\beta$ -3Gal $\beta$ -4Glc $\beta$ -Cer42                         | -   |
| 129 | SU(3')-Tri               | SU-3Gal $\beta$ -4GlcNAc $\beta$ -3Gal                                                                 | 3   |
| 130 | GSC-208                  | SU-3GlcA $\beta$ -3Gal $\beta$ -4GlcNAc $\beta$ -3Gal $\beta$ -4Glc $\beta$ -C30                       | -   |
| 131 | GSC-192                  | SU-3GlcA $\beta$ -3Gal $\beta$ -4GlcNAc $\beta$ -3Gal $\beta$ -4Glc $\beta$ -Cer36                     | 4   |
| 132 | GSC-190                  | SU-3GlcA $\beta$ -3Gal $\beta$ -4GlcNAc $\beta$ -3Gal $\beta$ -4Glc $\beta$ -Cer42                     | -   |
| 133 | Led-II pentaosylceramide | Fuca-2Gal $\beta$ -3GlcNAc $\beta$ -3Gal $\beta$ -4Glc $\beta$ -CerA                                   | -   |

|     |                         |                                                                            |   |
|-----|-------------------------|----------------------------------------------------------------------------|---|
| 134 | Led-I pentaosylceramide | Fuca-2Galβ-3GlcNAcβ-3Galβ-4Glcβ-CerB                                       | - |
| 135 | LNFP-I                  | Fuca-2Galβ-3GlcNAcβ-3Galβ-4Glc                                             | - |
| 136 | B-hexaosylceramide      | Galα-3Galβ-4GlcNAcβ-3Galβ-4Glcβ-Cer<br> <br>Fuca-2                         | - |
| 137 | A-Hexa                  | GalNAcα-3Galβ-3GlcNAcβ-3Galβ-4Glc<br> <br>Fuca-2                           | - |
| 138 | A-Hepta                 | GalNAcα-3Galβ-3GlcNAcβ-3Galβ-4Glc<br>       <br>Fuca-2 Fuca-4              | - |
| 139 | LNFP-II                 | Galβ-3GlcNAcβ-3Galβ-4Glc<br> <br>Fuca-4                                    | 9 |
| 140 | LNDFH-II                | Galβ-3GlcNAcβ-3Galβ-4Glc<br>               <br>Fuca-4         Fuca-3       | - |
| 141 | Leb-hexaosylceramide    | Fuca-2Galβ-3GlcNAcβ-3Galβ-4Glcβ-Cer<br> <br>Fuca-4                         | 9 |
| 142 | LNDFH-I                 | Fuca-2Galβ-3GlcNAcβ-3Galβ-4Glc<br> <br>Fuca-4                              | - |
| 143 | LNTFH-I                 | Fuca-2Galβ-3GlcNAcβ-3Galβ-4Glc<br>               <br>Fuca-4         Fuca-2 | 3 |
| 144 | LNFP-III                | Galβ-4GlcNAcβ-3Galβ-4Glc<br> <br>Fuca-3                                    | 7 |
| 145 | LNFP-III-AO             | Galβ-4GlcNAcβ-3Galβ-4Glc-AO<br> <br>Fuca-3                                 | - |
| 146 | LNNDFH-I                | Fuca-2Galβ-4GlcNAcβ-3Galβ-4Glc<br> <br>Fuca-3                              | - |
| 147 | LNNDFH-II               | Galβ-4GlcNAcβ-3Galβ-4Glc<br>               <br>Fuca-3         Fuca-3       | - |
| 148 | LNNDFH-V                | Galβ-4GlcNAcβ-3Galβ-4Glc<br>               <br>Fuca-3         Fuca-2       | - |
| 149 | LNNTFH-I                | Fuca-2Galβ-4GlcNAcβ-3Galβ-4Glc<br>               <br>Fuca-3         Fuca-2 | - |
| 150 | SU(3')-LNFP-II          | SU-3Galβ-3GlcNAcβ-4Galβ-4Glc<br> <br>Fuca-4                                | - |

|     |                     |                                                                                               |    |
|-----|---------------------|-----------------------------------------------------------------------------------------------|----|
| 151 | SU(6')-LNFP-II      | SU-6Gal $\beta$ -3GlcNAc $\beta$ -3Gal $\beta$ -4Glc<br> <br>Fuca-4                           | 14 |
| 152 | SU(6')-LNFP-III     | SU-6Gal $\beta$ -4GlcNAc $\beta$ -3Gal $\beta$ -4Glc<br> <br>Fuca-3                           | 3  |
| 153 | SU(3',6)-LNFP-III   | SU-6<br> <br>SU-3Gal $\beta$ -4GlcNAc $\beta$ -3Gal $\beta$ -4Glc<br> <br>Fuca-3              | 5  |
| 154 | LSTa                | NeuAc $\alpha$ -3Gal $\beta$ -3GlcNAc $\beta$ -3Gal $\beta$ -4Glc                             | 3  |
| 155 | GSC-272             | NeuAc $\alpha$ -3Gal $\beta$ -3GlcNAc $\beta$ -3Gal $\beta$ -4Glc $\beta$ -C30                | -  |
| 156 | GSC-396             | NeuGc $\alpha$ -3Gal $\beta$ -3GlcNAc $\beta$ -3Gal $\beta$ -4Glc $\beta$ -C30                | -  |
| 157 | LSTb                | Gal $\beta$ -3GlcNAc $\beta$ -3Gal $\beta$ -4Glc<br> <br>NeuAc $\alpha$ -6                    | -  |
| 158 | GSC-397             | NeuGc $\alpha$ -6Gal $\beta$ -3GlcNAc $\beta$ -3Gal $\beta$ -4Glc $\beta$ -C30                | 5  |
| 159 | DSLNT               | NeuAc $\alpha$ -3Gal $\beta$ -3GlcNAc $\beta$ -3Gal $\beta$ -4Glc<br> <br>NeuAc $\alpha$ -6   | 7  |
| 160 | Sialylparagloboside | NeuAc $\alpha$ -3Gal $\beta$ -4GlcNAc $\beta$ -3Gal $\beta$ -4Glc $\beta$ -Cer                | -  |
| 161 | GSC-273             | NeuAc $\alpha$ -3Gal $\beta$ -4GlcNAc $\beta$ -3Gal $\beta$ -4Glc $\beta$ -C30                | -  |
| 162 | GSC-31              | NeuAc $\alpha$ -3Gal $\beta$ -4GlcNAc $\beta$ -3Gal $\beta$ -4Glc $\beta$ -Cer36              | -  |
| 163 | LSTc                | NeuAc $\alpha$ -6Gal $\beta$ 4-GlcNAc $\beta$ 3-Gal $\beta$ 4-Glc                             | -  |
| 164 | GSC-516B            | Neu $\alpha$ -3Gal $\beta$ -4GlcNAc $\beta$ -3Gal $\beta$ -4Glc $\beta$ -Cer36<br> <br>SU-6   | -  |
| 165 | SA(3/6)LNFP-I       | NeuAc $\alpha$ -3/6Gal $\beta$ -3GlcNAc $\beta$ -3Gal $\beta$ -4Glc<br> <br>Fuca-2            | -  |
| 166 | SA(3')-LNFP-II      | NeuAc $\alpha$ -3Gal $\beta$ -3GlcNAc $\beta$ -3Gal $\beta$ -4Glc<br> <br>Fuca-4              | 1  |
| 167 | SA(6')-LNFP-VI      | NeuAc $\alpha$ -6Gal $\beta$ -4GlcNAc $\beta$ -3Gal $\beta$ -4Glc<br> <br>Fuca-3              | 5  |
| 168 | GSC-533             | NeuAc $\alpha$ -3Gal $\beta$ -4GlcN $\beta$ -3Gal $\beta$ -4Glc $\beta$ -Cer36<br> <br>Fuca-3 | 1  |

|                               |                 |                                                                                                                               |   |
|-------------------------------|-----------------|-------------------------------------------------------------------------------------------------------------------------------|---|
| 169                           | GSC-64          | NeuAc $\alpha$ -3Gal $\beta$ -4GlcNAc $\beta$ -3Gal $\beta$ -4Glc $\beta$ -Cer36<br> <br>Fuca-3                               | - |
| 170                           | SA(3')-LNFP-III | NeuAc $\alpha$ -3Gal $\beta$ -4GlcNAc $\beta$ -3Gal $\beta$ -4Glc<br> <br>Fuca-3                                              | 9 |
| 171                           | GSC-472         | Neu $\alpha$ -3Gal $\beta$ -4GlcNAc $\beta$ -3Gal $\beta$ -4Glc $\beta$ -Cer36<br> <br>Fuca-3                                 | - |
| 172                           | GSC-97          | NeuAc $\alpha$ -6Gal $\beta$ -4GlcNAc $\beta$ -3Gal $\beta$ -4Glc $\beta$ -Cer36<br> <br>Fuca-3                               | - |
| 173                           | GSC-314         | KDN $\alpha$ -3Gal $\beta$ -4GlcNAc $\beta$ -3Gal $\beta$ -4Glc $\beta$ -C30<br> <br>Fuca-3                                   | 3 |
| 174                           | GSC-149         | KDN $\alpha$ -3Gal $\beta$ -4GlcNAc $\beta$ -3Gal $\beta$ -4Glc $\beta$ -Cer36<br> <br>Fuca-3                                 | - |
| 175                           | GSC-311         | KDN $\alpha$ -3Gal $\beta$ -4GlcNAc $\beta$ -3Gal $\beta$ -4Glc $\beta$ -C30<br> <br>Rha $\alpha$ -3                          | - |
| 176                           | GSC-268         | SU-6<br> <br>NeuAc $\alpha$ -3Gal $\beta$ -4GlcNAc $\beta$ -3Gal $\beta$ -4Glc $\beta$ -Cer36<br> <br>Fuca-3                  | - |
| 177                           | GSC-268 deNAc   | SU-6<br> <br>Neu $\alpha$ -3Gal $\beta$ -4GlcN $\beta$ -3Gal $\beta$ -4Glc $\beta$ -Cer36<br> <br>Fuca-3                      | 1 |
| 178                           | GSC-269         | SU-6<br> <br>NeuAc $\alpha$ -3Gal $\beta$ -4GlcNAc $\beta$ -3Gal $\beta$ -4Glc $\beta$ -Cer36<br> <br>Fuca-3                  | - |
| 179                           | GSC-406         | SU-6<br> <br>Neu $\alpha$ -3Gal $\beta$ -4GlcNAc $\beta$ -3Gal $\beta$ -4Glc $\beta$ -Cer36<br> <br>Fuca-3                    | - |
| 180                           | GSC-270         | SU-6    SU-6<br>          <br>NeuAc $\alpha$ -3Gal $\beta$ -4GlcNAc $\beta$ -3Gal $\beta$ -4Glc $\beta$ -Cer36<br> <br>Fuca-3 | - |
| <b><i>Polylectosamine</i></b> |                 |                                                                                                                               |   |
| 181                           | pLNH            | Gal $\beta$ -3GlcNAc $\beta$ -3Gal $\beta$ -4GlcNAc $\beta$ -3Gal $\beta$ -4Glc                                               | 7 |
| 182                           | pLNnH           | Gal $\beta$ -4GlcNAc $\beta$ -3Gal $\beta$ -4GlcNAc $\beta$ -3Gal $\beta$ -4Glc                                               | 7 |
| 183                           | GSC-216         | GlcA $\beta$ -3Gal $\beta$ -4GlcNAc $\beta$ -3Gal $\beta$ -4GlcNAc $\beta$ -3Gal $\beta$ -4Glc $\beta$ -Cer42                 | - |

|     |                        |                                                                                                                                                                                                                                                                                                                                                                                                                                                                                                                                 |   |
|-----|------------------------|---------------------------------------------------------------------------------------------------------------------------------------------------------------------------------------------------------------------------------------------------------------------------------------------------------------------------------------------------------------------------------------------------------------------------------------------------------------------------------------------------------------------------------|---|
| 184 | GSC-217                | SU-3GlcA $\beta$ -3Gal $\beta$ -4GlcNAc $\beta$ -3Gal $\beta$ -4GlcNAc $\beta$ -3Gal $\beta$ -4Glc $\beta$ -Cer42                                                                                                                                                                                                                                                                                                                                                                                                               | - |
| 185 | GSC-218                | GlcA $\beta$ -3Gal $\beta$ -4GlcNAc $\beta$ -3Gal $\beta$ -4GlcNAc $\beta$ -3Gal $\beta$ -4Glc $\beta$ -Cer36                                                                                                                                                                                                                                                                                                                                                                                                                   | - |
| 186 | GSC-219                | SU-3GlcA $\beta$ -3Gal $\beta$ -4GlcNAc $\beta$ -3Gal $\beta$ -4GlcNAc $\beta$ -3Gal $\beta$ -4Glc $\beta$ -Cer36                                                                                                                                                                                                                                                                                                                                                                                                               | - |
| 187 | LNH                    | Gal $\beta$ -4GlcNAc $\beta$ -6<br> <br>Gal $\beta$ -4Glc<br> <br>Gal $\beta$ -3GlcNAc $\beta$ -3                                                                                                                                                                                                                                                                                                                                                                                                                               | - |
| 188 | iLNO                   | Gal $\beta$ -3GlcNAc $\beta$ -3Gal $\beta$ -4GlcNAc $\beta$ -6<br> <br>Gal $\beta$ -4Glc<br> <br>Gal $\beta$ -3GlcNAc $\beta$ -3                                                                                                                                                                                                                                                                                                                                                                                                | - |
| 189 | LND                    | Gal $\beta$ -4GlcNAc $\beta$ -6<br> <br>Gal $\beta$ -4GlcNAc $\beta$ -6<br> <br>Gal $\beta$ -3GlcNAc $\beta$ -3<br> <br>Gal $\beta$ -4Glc<br> <br>Gal $\beta$ -3GlcNAc $\beta$ -3                                                                                                                                                                                                                                                                                                                                               | - |
| 190 | LNnH                   | Gal $\beta$ -4GlcNAc $\beta$ -6<br> <br>Gal $\beta$ -4Glc<br> <br>Gal $\beta$ -4GlcNAc $\beta$ -3                                                                                                                                                                                                                                                                                                                                                                                                                               | 3 |
| 191 | Nonaosylceramide       | GlcNAc $\beta$ -6<br> <br>Gal $\beta$ -4GlcNAc $\beta$ -3<br> <br>Gal $\beta$ -4GlcNAc $\beta$ -6<br> <br>Gal $\beta$ -4GlcNAc $\beta$ -3<br> <br>GlcNAc $\beta$ -3<br> <br>Gal $\beta$ -4GlcNAc $\beta$ -6<br> <br>Gal $\beta$ -4GlcNAc $\beta$ -3Gal $\beta$ -4Glc $\beta$ -Cer                                                                                                                                                                                                                                               | 8 |
| 192 | I-octaosylceramide     | Gal $\beta$ -4GlcNAc $\beta$ -6<br> <br>Gal $\beta$ -4GlcNAc $\beta$ -3Gal $\beta$ -4Glc $\beta$ -Cer<br> <br>Gal $\beta$ -4GlcNAc $\beta$ -3                                                                                                                                                                                                                                                                                                                                                                                   | - |
| 193 | I-dodecaosylceramide   | Gal $\beta$ -4GlcNAc $\beta$ -6<br> <br>Gal $\beta$ -4GlcNAc $\beta$ -6<br> <br>Gal $\beta$ -4GlcNAc $\beta$ -3<br> <br>Gal $\beta$ -4GlcNAc $\beta$ -3<br> <br>Gal $\beta$ -4GlcNAc $\beta$ -6<br> <br>Gal $\beta$ -4GlcNAc $\beta$ -3Gal $\beta$ -4Glc $\beta$ -Cer                                                                                                                                                                                                                                                           | - |
| 194 | I-hexadecaosylceramide | Gal $\beta$ -4GlcNAc $\beta$ -6<br> <br>Gal $\beta$ -4GlcNAc $\beta$ -6<br> <br>Gal $\beta$ -4GlcNAc $\beta$ -3Gal $\beta$ -4Glc $\beta$ -Cer<br> <br>Gal $\beta$ -4GlcNAc $\beta$ -6<br> <br>Gal $\beta$ -4GlcNAc $\beta$ -3Gal $\beta$ -4Glc $\beta$ -Cer<br> <br>Gal $\beta$ -4GlcNAc $\beta$ -6<br> <br>Gal $\beta$ -4GlcNAc $\beta$ -3Gal $\beta$ -4Glc $\beta$ -Cer<br> <br>Gal $\beta$ -4GlcNAc $\beta$ -6<br> <br>Gal $\beta$ -4GlcNAc $\beta$ -3Gal $\beta$ -4Glc $\beta$ -Cer<br> <br>Gal $\beta$ -4GlcNAc $\beta$ -3 | - |

|     |                              |                                                                                                                                                                                                                                                                                                                                                                                                                                                                                                                                                                                               |    |
|-----|------------------------------|-----------------------------------------------------------------------------------------------------------------------------------------------------------------------------------------------------------------------------------------------------------------------------------------------------------------------------------------------------------------------------------------------------------------------------------------------------------------------------------------------------------------------------------------------------------------------------------------------|----|
| 195 | I-eicosaosylceramide         | <p style="text-align: center;">Galβ-4GlcNAcβ-6</p> <p style="text-align: center;">Galβ-4GlcNAcβ-6      Galβ-4GlcNAcβ-6</p> <p style="text-align: center;">                                                               </p> <p style="text-align: center;">Galβ-4GlcNAcβ-6      Galβ-4GlcNAcβ-3      Galβ-4GlcNAcβ-6</p> <p style="text-align: center;">                                </p> <p style="text-align: center;">Galβ-4GlcNAcβ-3      Galβ-4GlcNAcβ-6</p> <p style="text-align: center;">                                </p> <p style="text-align: center;">Galβ-4GlcNAcβ-3</p> | -  |
| 196 | B-like decaosylceramide      | <p style="text-align: center;">Galα-3Galβ-4GlcNAcβ-6</p> <p style="text-align: center;"> </p> <p style="text-align: center;">Galβ-4GlcNAcβ-3Galβ-4Glcβ-Cer</p> <p style="text-align: center;"> </p> <p style="text-align: center;">Galα-3Galβ-4GlcNAcβ-3</p>                                                                                                                                                                                                                                                                                                                                  | -  |
| 197 | B-like pentadecaosylceramide | <p style="text-align: center;">Galα-3Galβ-4GlcNAcβ-6</p> <p style="text-align: center;"> </p> <p style="text-align: center;">Galα-3Galβ-4GlcNAcβ-6      Galβ-4GlcNAcβ-3Galβ-4Glcβ-Cer</p> <p style="text-align: center;">                                </p> <p style="text-align: center;">Galβ-4GlcNAcβ-3      Galβ-4GlcNAcβ-3</p> <p style="text-align: center;"> </p> <p style="text-align: center;">Galα-3Galβ-4GlcNAcβ-3</p>                                                                                                                                                           | 5  |
| 198 | B-like eicosaosylceramide    | <p style="text-align: center;">Galα-3Galβ-4GlcNAcβ-6</p> <p style="text-align: center;"> </p> <p style="text-align: center;">Galα-3Galβ-4GlcNAcβ-6      Galβ-4GlcNAcβ-3Galβ-4Glcβ-Cer</p> <p style="text-align: center;">                                </p> <p style="text-align: center;">Galβ-4GlcNAcβ-3      Galβ-4GlcNAcβ-3</p> <p style="text-align: center;"> </p> <p style="text-align: center;">Galα-3Galβ-4GlcNAcβ-3</p>                                                                                                                                                           | -  |
| 199 | pLNFH-IV                     | <p style="text-align: center;">Galβ-3GlcNAcβ-3Galβ-4GlcNAcβ-3Galβ-4Glc</p> <p style="text-align: center;"> </p> <p style="text-align: center;">Fuca-3</p>                                                                                                                                                                                                                                                                                                                                                                                                                                     | -  |
| 200 | DFpLNH-II                    | <p style="text-align: center;">Galβ-3GlcNAcβ-3Galβ-4GlcNAcβ-3Galβ-4Glc</p> <p style="text-align: center;">                                </p> <p style="text-align: center;">Fuca-4                      Fuca-3</p>                                                                                                                                                                                                                                                                                                                                                                          | 14 |
| 201 | TFpLNH-I                     | <p style="text-align: center;">Fuca-2Galβ-3GlcNAcβ-3Galβ-4GlcNAcβ-3Galβ-4Glc</p> <p style="text-align: center;">                                </p> <p style="text-align: center;">Fuca-4                      Fuca-3</p>                                                                                                                                                                                                                                                                                                                                                                    | 12 |
| 202 | DFLNH(b)                     | <p style="text-align: center;">Fuca-3</p> <p style="text-align: center;"> </p> <p style="text-align: center;">Galβ-4GlcNAcβ-6</p> <p style="text-align: center;"> </p> <p style="text-align: center;">Galβ-4Glc</p> <p style="text-align: center;"> </p> <p style="text-align: center;">Galβ-3GlcNAcβ-3</p> <p style="text-align: center;"> </p> <p style="text-align: center;">Fuca-4</p>                                                                                                                                                                                                    | -  |

|     |                          |                                                                                                                                                            |   |
|-----|--------------------------|------------------------------------------------------------------------------------------------------------------------------------------------------------|---|
| 203 | DFLNH(a)                 | <pre> Galβ-4GlcNAcβ-6   Fuca-3      Galβ-4Glc               Fuca-2Galβ-3GlcNAcβ-3 </pre>                                                                   | - |
| 204 | TFLNH                    | <pre> Galβ-4GlcNAcβ-6   Fuca-3      Galβ-4Glc               Fuca-2Galβ-3GlcNAcβ-3   Fuca-4 </pre>                                                          | 7 |
| 205 | MFiLNO-IV                | <pre> Galβ-3GlcNAcβ-3Galβ-4GlcNAcβ-6               Fuca-3      Galβ-4Glc               Galβ-3GlcNAcβ-3 </pre>                                              | - |
| 206 | TFiLNO                   | <pre> Galβ-3GlcNAcβ-3Galβ-4GlcNAcβ-6                           Fuca-4      Fuca-3      Galβ-4Glc                           Galβ-3GlcNAcβ-3   Fuca-4 </pre> | - |
| 207 | MFLND                    | <pre> Galβ-4GlcNAcβ-6   Fuca-3      Galβ-4GlcNAcβ-6               Galβ-3GlcNAcβ-3      Galβ-4Glc   Galβ-3GlcNAcβ-3 </pre>                                  | - |
| 208 | MFLNnH(a)                | <pre> Galβ-4GlcNAcβ-6   Fuca-3      Galβ-4Glc               Galβ-4GlcNAcβ-3 </pre>                                                                         | 3 |
| 209 | DFLNnH                   | <pre> Fuca-3   Galβ-4GlcNAcβ-6   Galβ-4Glc   Galβ-4GlcNAcβ-3   Fuca-3 </pre>                                                                               | - |
| 210 | B-III dodecaosylceramide | <pre> Galα-3Galβ-4GlcNAcβ-6               Fuca-2      Galβ-4GlcNAcβ-3Galβ-4Glcβ-Cer               Galα-3Galβ-4GlcNAcβ-3   Fuca-2 </pre>                    | 9 |



|                                |                            |                                                                                                                                                                                                                                                                                                                                                                                                                                 |    |
|--------------------------------|----------------------------|---------------------------------------------------------------------------------------------------------------------------------------------------------------------------------------------------------------------------------------------------------------------------------------------------------------------------------------------------------------------------------------------------------------------------------|----|
| 211                            | B-IV tetradecaosylceramide | $\begin{array}{c} \text{Gal}\alpha\text{-3Gal}\beta\text{-4GlcNAc}\beta\text{-6} \\   \\ \text{Fuca}\alpha\text{-2} \qquad \qquad \qquad   \\ \qquad \qquad \qquad \qquad \qquad \qquad \text{Gal}\beta\text{-4GlcNAc}\beta\text{-3Gal}\beta\text{-4Glc}\beta\text{-Cer} \\ \text{Gal}\alpha\text{-3Gal}\beta\text{-4GlcNAc}\beta\text{-3Gal}\beta\text{-4GlcNAc}\beta\text{-3} \\   \\ \text{Fuca}\alpha\text{-2} \end{array}$ | -  |
| 212                            | MSLNH                      | $\begin{array}{c} \text{NeuAc}\alpha\text{-6Gal}\beta\text{-4GlcNAc}\beta\text{-6} \\   \\ \text{Gal}\beta\text{-4Glc} \\   \\ \text{Gal}\beta\text{-3GlcNAc}\beta\text{-3} \end{array}$                                                                                                                                                                                                                                        | -  |
| 213                            | MSLNnH-I                   | $\begin{array}{c} \text{Gal}\beta\text{-4GlcNAc}\beta\text{-6} \\   \\ \text{Gal}\beta\text{-4Glc} \\   \\ \text{NeuAc}\alpha\text{-6Gal}\beta\text{-3GlcNAc}\beta\text{-3} \end{array}$                                                                                                                                                                                                                                        | -  |
| 214                            | DSLNNH                     | $\begin{array}{c} \text{NeuAc}\alpha\text{-6Gal}\beta\text{-4GlcNAc}\beta\text{-6} \\   \\ \text{Gal}\beta\text{-4Glc} \\   \\ \text{NeuAc}\alpha\text{-6Gal}\beta\text{-4GlcNAc}\beta\text{-3} \end{array}$                                                                                                                                                                                                                    | 11 |
| 215                            | MSMFLNH                    | $\begin{array}{c} \text{Gal}\beta\text{-4GlcNAc}\beta\text{-6} \\   \qquad \qquad \qquad   \\ \text{Fuca}\alpha\text{-3} \qquad \qquad \text{Gal}\beta\text{-4Glc} \\   \\ \text{NeuAc}\alpha\text{-3Gal}\beta\text{-3GlcNAc}\beta\text{-3} \end{array}$                                                                                                                                                                        | -  |
| 216                            | MFMSLNnH                   | $\begin{array}{c} \text{Gal}\beta\text{-4GlcNAc}\beta\text{-6} \\   \qquad \qquad \qquad   \\ \text{Fuca}\alpha\text{-3} \qquad \qquad \text{Gal}\beta\text{-4Glc} \\   \\ \text{NeuAc}\alpha\text{-6Gal}\beta\text{-3GlcNAc}\beta\text{-3} \end{array}$                                                                                                                                                                        | 6  |
| 217                            | GSC-221                    | $\begin{array}{c} \text{NeuAc}\alpha\text{-3Gal}\beta\text{-4GlcNAc}\beta\text{-3Gal}\beta\text{-4GlcNAc}\beta\text{-3Gal}\beta\text{-4Glc}\beta\text{-Cer36} \\   \\ \text{Fuca}\alpha\text{-3} \end{array}$                                                                                                                                                                                                                   | -  |
| 218                            | GSC-220                    | $\begin{array}{c} \text{NeuAc}\alpha\text{-3Gal}\beta\text{-4GlcNAc}\beta\text{-3Gal}\beta\text{-4GlcNAc}\beta\text{-3Gal}\beta\text{-4Glc}\beta\text{-Cer36} \\   \qquad \qquad \qquad   \\ \text{Fuca}\alpha\text{-3} \qquad \qquad \text{Fuca}\alpha\text{-3} \end{array}$                                                                                                                                                   | -  |
| 219                            | C4U                        | $\begin{array}{c} \text{NeuAc}\alpha\text{-3Gal}\beta\text{-4GlcNAc}\beta\text{-3Gal}\beta\text{-3GlcNAc} \\   \qquad \qquad \qquad   \qquad   \\ \text{SU-6} \qquad \qquad \text{SU-6} \qquad \text{SU-6} \end{array}$                                                                                                                                                                                                         | -  |
| <b><i>N-glycan-related</i></b> |                            |                                                                                                                                                                                                                                                                                                                                                                                                                                 |    |
| 220                            | Man2( $\alpha$ 2)          | Man $\alpha$ -2Man                                                                                                                                                                                                                                                                                                                                                                                                              | 15 |
| 221                            | Man2( $\alpha$ 3)          | Man $\alpha$ -3Man                                                                                                                                                                                                                                                                                                                                                                                                              | 3  |
| 222                            | Man2( $\alpha$ 6)          | Man $\alpha$ -6Man                                                                                                                                                                                                                                                                                                                                                                                                              | -  |

|     |                               |                                                                                                                                                                                                                                                  |    |
|-----|-------------------------------|--------------------------------------------------------------------------------------------------------------------------------------------------------------------------------------------------------------------------------------------------|----|
| 223 | Man3( $\alpha$ 3, $\alpha$ 6) | $\begin{array}{c} \text{Man}\alpha\text{-6Man} \\   \\ \text{Man}\alpha\text{-3} \end{array}$                                                                                                                                                    | -  |
| 224 | Man5( $\alpha$ 3, $\alpha$ 6) | $\begin{array}{c} \text{Man}\alpha\text{-6Man}\alpha\text{-6Man} \\   \quad   \\ \text{Man}\alpha\text{-3} \quad \text{Man}\alpha\text{-3} \end{array}$                                                                                          | -  |
| 225 | Man1GN1                       | Man $\beta$ -4GlcNAc                                                                                                                                                                                                                             | 3  |
| 226 | Man2GN1                       | Man $\alpha$ -3Man $\beta$ -4GlcNAc                                                                                                                                                                                                              | -  |
| 227 | Man2aGN2                      | Man $\alpha$ -6Man $\beta$ -4GlcNAc $\beta$ -4GlcNAc                                                                                                                                                                                             | -  |
| 228 | Man4aGN2                      | $\begin{array}{c} \text{Man}\alpha\text{-3Man}\alpha\text{-6} \\   \\ \text{Man}\beta\text{-4GlcNAc}\beta\text{-4GlcNAc} \\   \\ \text{Man}\alpha\text{-3} \end{array}$                                                                          | -  |
| 229 | Man4bGN2                      | $\begin{array}{c} \text{Man}\alpha\text{-6} \\   \\ \text{Man}\alpha\text{-3Man}\alpha\text{-6} \\   \\ \text{Man}\beta\text{-4GlcNAc}\beta\text{-4GlcNAc} \end{array}$                                                                          | 11 |
| 230 | Man5GN2                       | $\begin{array}{c} \text{Man}\alpha\text{-6} \\   \\ \text{Man}\alpha\text{-3Man}\alpha\text{-6} \\   \\ \text{Man}\beta\text{-4GlcNAc}\beta\text{-4GlcNAc} \\   \\ \text{Man}\alpha\text{-3} \end{array}$                                        | 9  |
| 231 | Man6GN2                       | $\begin{array}{c} \text{Man}\alpha\text{-6} \\   \\ \text{Man}\alpha\text{-3Man}\alpha\text{-6} \\   \\ \text{Man}\beta\text{-4GlcNAc}\beta\text{-4GlcNAc} \\   \\ \text{Man}\alpha\text{-2Man}\alpha\text{-3} \end{array}$                      | 13 |
| 232 | Man7(D1)GN2                   | $\begin{array}{c} \text{Man}\alpha\text{-6} \\   \\ \text{Man}\alpha\text{-3Man}\alpha\text{-6} \\   \\ \text{Man}\beta\text{-4GlcNAc}\beta\text{-4GlcNAc} \\   \\ \text{Man}\alpha\text{-2Man}\alpha\text{-2Man}\alpha\text{-3} \end{array}$    | 4  |
| 233 | Man7(D1)GN2-AO                | $\begin{array}{c} \text{Man}\alpha\text{-6} \\   \\ \text{Man}\alpha\text{-3Man}\alpha\text{-6} \\   \\ \text{Man}\beta\text{-4GlcNAc}\beta\text{-4GlcNAc-AO} \\   \\ \text{Man}\alpha\text{-2Man}\alpha\text{-2Man}\alpha\text{-3} \end{array}$ | -  |

|     |                    |                                                                                                                                                                                                                                                                                                                                          |    |
|-----|--------------------|------------------------------------------------------------------------------------------------------------------------------------------------------------------------------------------------------------------------------------------------------------------------------------------------------------------------------------------|----|
| 234 | Man7(D3)GN2        | $  \begin{array}{c}  \text{Man}\alpha\text{-2Man}\alpha\text{-6} \\    \\  \text{Man}\alpha\text{-3Man}\alpha\text{-6} \\    \\  \text{Man}\beta\text{-4GlcNAc}\beta\text{-4GlcNAc} \\    \\  \text{Man}\alpha\text{-2Man}\alpha\text{-3}  \end{array}  $                                                                                | -  |
| 235 | Man8(D1D3)GN2      | $  \begin{array}{c}  \text{Man}\alpha\text{-2Man}\alpha\text{-6} \\    \\  \text{Man}\alpha\text{-3Man}\alpha\text{-6} \\    \\  \text{Man}\beta\text{-4GlcNAc}\beta\text{-4GlcNAc} \\    \\  \text{Man}\alpha\text{-2Man}\alpha\text{-2Man}\alpha\text{-3}  \end{array}  $                                                              | -  |
| 236 | Man9GN2            | $  \begin{array}{c}  \text{Man}\alpha\text{-2Man}\alpha\text{-6} \\    \\  \text{Man}\alpha\text{-2Man}\alpha\text{-3Man}\alpha\text{-6} \\    \\  \text{Man}\beta\text{-4GlcNAc}\beta\text{-4GlcNAc} \\    \\  \text{Man}\alpha\text{-2Man}\alpha\text{-2Man}\alpha\text{-3}  \end{array}  $                                            | 5  |
| 237 | Man9GN2-AO         | $  \begin{array}{c}  \text{Man}\alpha\text{-2Man}\alpha\text{-6} \\    \\  \text{Man}\alpha\text{-2Man}\alpha\text{-3Man}\alpha\text{-6} \\    \\  \text{Man}\beta\text{-4GlcNAc}\beta\text{-4GlcNAc-AO} \\    \\  \text{Man}\alpha\text{-2Man}\alpha\text{-2Man}\alpha\text{-3}  \end{array}  $                                         | -  |
| 238 | Glc1Man9GN2        | $  \begin{array}{c}  \text{Man}\alpha\text{-2Man}\alpha\text{-6} \\    \\  \text{Man}\alpha\text{-6} \\    \quad   \\  \text{Man}\alpha\text{-2Man}\alpha\text{-3} \quad \text{Man}\beta\text{-4GlcNAc}\beta\text{-4GlcNAc} \\    \\  \text{Glc}\alpha\text{-3Man}\alpha\text{-2Man}\alpha\text{-2Man}\alpha\text{-3}  \end{array}  $    | 26 |
| 239 | Glc1Man9GN2-AO     | $  \begin{array}{c}  \text{Man}\alpha\text{-2Man}\alpha\text{-6} \\    \\  \text{Man}\alpha\text{-6} \\    \quad   \\  \text{Man}\alpha\text{-2Man}\alpha\text{-3} \quad \text{Man}\beta\text{-4GlcNAc}\beta\text{-4GlcNAc-AO} \\    \\  \text{Glc}\alpha\text{-3Man}\alpha\text{-2Man}\alpha\text{-2Man}\alpha\text{-3}  \end{array}  $ | -  |
| 240 | Glc2Man7(D1)GN1-AO | $  \begin{array}{c}  \text{Man}\alpha\text{-6} \\    \\  \text{Man}\alpha\text{-3Man}\alpha\text{-6} \\    \\  \text{Man}\beta\text{-4GlcNAc-AO} \\    \\  \text{Glc}\alpha\text{-3Glc}\alpha\text{-3Man}\alpha\text{-2Man}\alpha\text{-2Man}\alpha\text{-3}  \end{array}  $                                                             | -  |

|     |                    |                                                                                                                                                                                                                                                                                                     |    |
|-----|--------------------|-----------------------------------------------------------------------------------------------------------------------------------------------------------------------------------------------------------------------------------------------------------------------------------------------------|----|
| 241 | Glc3Man7(D1)GN1-AO | $  \begin{array}{c}  \text{Man}\alpha\text{-6} \\    \\  \text{Man}\alpha\text{-3Man}\alpha\text{-6} \\    \\  \text{Man}\beta\text{-4GlcNAc-AO} \\    \\  \text{Glc}\alpha\text{-2Glc}\alpha\text{-3Glc}\alpha\text{-3Man}\alpha\text{-2Man}\alpha\text{-2Man}\alpha\text{-3}  \end{array}  $      | -  |
| 242 | Man3XylGN2         | $  \begin{array}{c}  \text{Man}\alpha\text{-6} \\    \\  \text{Xyl}\beta\text{-2Man}\beta\text{-4GlcNAc}\beta\text{-4GlcNAc} \\    \\  \text{Man}\alpha\text{-3}  \end{array}  $                                                                                                                    | -  |
| 243 | N1                 | $  \begin{array}{c}  \text{Gal}\beta\text{-4GlcNAc}\beta\text{-2Man}\alpha\text{-6} \qquad \text{Fuca}\alpha\text{-6} \\    \qquad \qquad \qquad   \\  \text{Man}\beta\text{-4GlcNAc}\beta\text{-4GlcNAc} \\    \\  \text{Man}\alpha\text{-3}  \end{array}  $                                       | 56 |
| 244 | N2                 | $  \begin{array}{c}  \text{Man}\alpha\text{-6} \\    \\  \text{Man}\beta\text{-4GlcNAc}\beta\text{-4GlcNAc} \\    \\  \text{Gal}\beta\text{-4GlcNAc}\beta\text{-2Man}\alpha\text{-3}  \end{array}  $                                                                                                | -  |
| 245 | N4                 | $  \begin{array}{c}  \text{Gal}\beta\text{-4GlcNAc}\beta\text{-2Man}\alpha\text{-6} \\    \\  \text{Man}\beta\text{-4GlcNAc}\beta\text{-4GlcNAc} \quad ? \\    \\  \text{Man}\alpha\text{-3}  \end{array}  $                                                                                        | 7  |
| 246 | N3                 | $  \begin{array}{c}  (\text{Gal}\beta\text{-4}) \text{GlcNAc}\beta\text{-2Man}\alpha\text{-6} \qquad \text{Fuca}\alpha\text{-6} \\    \qquad \qquad \qquad   \\  \text{Man}\beta\text{-4GlcNAc}\beta\text{-4GlcNAc} \\    \\  ? \quad \text{GlcNAc}\beta\text{-2Man}\alpha\text{-3}  \end{array}  $ | 4  |
| 247 | NGA2               | $  \begin{array}{c}  \text{GlcNAc}\beta\text{-2Man}\alpha\text{-6} \\    \\  \text{Man}\beta\text{-4GlcNAc}\beta\text{-4GlcNAc} \\    \\  \text{GlcNAc}\beta\text{-2Man}\alpha\text{-3}  \end{array}  $                                                                                             | 1  |
| 248 | NGA2B              | $  \begin{array}{c}  \text{GlcNAc}\beta\text{-2Man}\alpha\text{-6} \\    \\  \text{GlcNAc}\beta\text{-4Man}\beta\text{-4GlcNAc}\beta\text{-4GlcNAc} \\    \\  \text{GlcNAc}\beta\text{-2Man}\alpha\text{-3}  \end{array}  $                                                                         | 8  |
| 249 | NGA3B              | $  \begin{array}{c}  \text{GlcNAc}\beta\text{-2Man}\alpha\text{-6} \\    \\  \text{GlcNAc}\beta\text{-4Man}\beta\text{-4GlcNAc}\beta\text{-4GlcNAc} \\    \\  \text{GlcNAc}\beta\text{-4Man}\alpha\text{-3} \\    \\  \text{GlcNAc}\beta\text{-2}  \end{array}  $                                   | -  |

|     |            |                                                                                                                        |    |
|-----|------------|------------------------------------------------------------------------------------------------------------------------|----|
| 250 | NGA4       | <pre> GlcNAcβ-6   GlcNAcβ-2Manα-6   Manβ-4GlcNAcβ-4GlcNAc   GlcNAcβ-2Manα-3   GlcNAcβ-4 </pre>                         | -  |
| 251 | NGA5B      | <pre> GlcNAcβ-2   GlcNAcβ-4Manα-6   GlcNAcβ-6   GlcNAcβ-4Manβ-4GlcNAcβ-4GlcNAc   GlcNAcβ-4Manα-3   GlcNAcβ-2 </pre>    | -  |
| 252 | GNMan5BGN2 | <pre> Manα-6   Manα-3Manα-6   GlcNAcβ-4Manβ-4GlcNAcβ-4GlcNAc   GlcNAcβ-2Manα-3 </pre>                                  | -  |
| 253 | NA2        | <pre> Galβ-4GlcNAcβ-2Manα-6   Manβ-4GlcNAcβ-4GlcNAc   Galβ-4GlcNAcβ-2Manα-3 </pre>                                     | -  |
| 254 | NA3        | <pre> Galβ-4GlcNAcβ-2Manα-6   Manβ-4GlcNAcβ-4GlcNAc   Galβ-4GlcNAcβ-4Manα-3   Galβ-4GlcNAcβ-2 </pre>                   | -  |
| 255 | NA4        | <pre> Galβ-4GlcNAcβ-6   Galβ-4GlcNAcβ-2Manα-6   Manβ-4GlcNAcβ-4GlcNAc   Galβ-4GlcNAcβ-4Manα-3   Galβ-4GlcNAcβ-2 </pre> | 4  |
| 256 | Fuc-GlcNAc | Fucα-6GlcNAc                                                                                                           | 14 |

|     |             |                                                                                                                                                                                                                                                                                                                     |   |
|-----|-------------|---------------------------------------------------------------------------------------------------------------------------------------------------------------------------------------------------------------------------------------------------------------------------------------------------------------------|---|
| 257 | Man3FGN2    | $\begin{array}{c} \text{Man}\alpha\text{-6} \qquad \text{Fuca}\alpha\text{-6} \\   \qquad \qquad   \\ \text{Man}\beta\text{-4GlcNAc}\beta\text{-4GlcNAc} \\   \\ \text{Man}\alpha\text{-3} \end{array}$                                                                                                             | 7 |
| 258 | Man3FXylGN2 | $\begin{array}{c} \text{Man}\alpha\text{-6} \\   \\ \text{Xyl}\beta\text{-2Man}\alpha\text{-4GlcNAc}\beta\text{-4GlcNAc} \\   \qquad \qquad   \\ \text{Man}\alpha\text{-3} \qquad \text{Fuca}\alpha\text{-3} \end{array}$                                                                                           | - |
| 259 | NGA2F       | $\begin{array}{c} \text{GlcNAc}\beta\text{-2Man}\alpha\text{-6} \qquad \text{Fuca}\alpha\text{-6} \\   \qquad \qquad   \\ \text{Man}\beta\text{-4GlcNAc}\beta\text{-4GlcNAc} \\   \\ \text{GlcNAc}\beta\text{-2Man}\alpha\text{-3} \end{array}$                                                                     | 9 |
| 260 | NA2F        | $\begin{array}{c} \text{Gal}\beta\text{-4GlcNAc}\beta\text{-2Man}\alpha\text{-6} \qquad \text{Fuca}\alpha\text{-6} \\   \qquad \qquad   \\ \text{Man}\beta\text{-4GlcNAc}\beta\text{-4GlcNAc} \\   \\ \text{Gal}\beta\text{-4GlcNAc}\beta\text{-2Man}\alpha\text{-3} \end{array}$                                   | - |
| 261 | NA2F-AO     | $\begin{array}{c} \text{Gal}\beta\text{-4GlcNAc}\beta\text{-2Man}\alpha\text{-6} \qquad \text{Fuca}\alpha\text{-6} \\   \qquad \qquad   \\ \text{Man}\beta\text{-4GlcNAc}\beta\text{-4GlcNAc-AO} \\   \\ \text{Gal}\beta\text{-4GlcNAc}\beta\text{-2Man}\alpha\text{-3} \end{array}$                                | - |
| 262 | NA2FB       | $\begin{array}{c} \text{Gal}\beta\text{-4GlcNAc}\beta\text{-2Man}\alpha\text{-6} \qquad \text{Fuca}\alpha\text{-6} \\   \qquad \qquad   \\ \text{GlcNAc}\beta\text{-4Man}\beta\text{-4GlcNAc}\beta\text{-4GlcNAc} \\   \\ \text{Gal}\beta\text{-4GlcNAc}\beta\text{-2Man}\alpha\text{-3} \end{array}$               | - |
| 263 | NA3-Lex     | $\begin{array}{c} \text{Gal}\beta\text{-4GlcNAc}\beta\text{-2Man}\alpha\text{-6} \\   \\ \text{Man}\beta\text{-4GlcNAc}\beta\text{-4GlcNAc} \\   \\ \text{Gal}\beta\text{-4GlcNAc}\beta\text{-4Man}\alpha\text{-3} \\   \\ \text{Gal}\beta\text{-4GlcNAc}\beta\text{-2} \\ +\text{Fuca}\alpha\text{-3} \end{array}$ | - |
| 264 | A2(2-6)     | $\begin{array}{c} \text{NeuAc}\alpha\text{-6Gal}\beta\text{-4GlcNAc}\beta\text{-2Man}\alpha\text{-6} \\   \\ \text{Man}\beta\text{-4GlcNAc}\beta\text{-4GlcNAc} \\   \\ \text{NeuAc}\alpha\text{-6Gal}\beta\text{-4GlcNAc}\beta\text{-2Man}\alpha\text{-3} \end{array}$                                             | - |
| 265 | AGP-Bi-Ac2  | $\begin{array}{c} \text{NeuAc}\alpha\text{-Gal}\beta\text{-4GlcNAc}\beta\text{-2Man}\alpha\text{-6} \\   \\ \text{Man}\beta\text{-4GlcNAc}\beta\text{-4GlcNAc} \\   \\ \text{NeuAc}\alpha\text{-Gal}\beta\text{-4GlcNAc}\beta\text{-2Man}\alpha\text{-3} \end{array}$                                               | - |

|                     |             |                                                                                                                                                                                                                                                                                                                                                                                                 |   |
|---------------------|-------------|-------------------------------------------------------------------------------------------------------------------------------------------------------------------------------------------------------------------------------------------------------------------------------------------------------------------------------------------------------------------------------------------------|---|
| 266                 | AGP-Bi-Gc2  | $\begin{array}{c} \text{NeuGc}\alpha\text{-Gal}\beta\text{-4GlcNAc}\beta\text{-2Man}\alpha\text{-6} \\   \\ \text{Man}\beta\text{-4GlcNAc}\beta\text{-4GlcNAc} \\   \\ \text{NeuGc}\alpha\text{-Gal}\beta\text{-4GlcNAc}\beta\text{-2Man}\alpha\text{-3} \end{array}$                                                                                                                           | - |
| 267                 | AGP-Bi-AcGc | $\begin{array}{c} \text{NeuGc}\alpha\text{-Gal}\beta\text{-4GlcNAc}\beta\text{-2Man}\alpha\text{-6} \\ ? \\   \\ \text{Man}\beta\text{-4GlcNAc}\beta\text{-4GlcNAc} \\   \\ \text{NeuAc}\alpha\text{-Gal}\beta\text{-4GlcNAc}\beta\text{-2Man}\alpha\text{-3} \end{array}$                                                                                                                      | - |
| 268                 | A3          | $\begin{array}{c} \text{NeuAc}\alpha\text{-3Gal}\beta\text{-4GlcNAc}\beta\text{-2Man}\alpha\text{-6} \\   \\ \text{Man}\beta\text{-4GlcNAc}\beta\text{-4GlcNAc} \\   \\ \text{NeuAc}\alpha\text{-3Gal}\beta\text{-4GlcNAc}\beta\text{-4Man}\alpha\text{-3} \\   \\ \text{NeuAc}\alpha\text{-6Gal}\beta\text{-4GlcNAc}\beta\text{-2} \end{array}$                                                | - |
| 269                 | A2F(2-3)    | $\begin{array}{c} \text{NeuAc}\alpha\text{-3Gal}\beta\text{-4GlcNAc}\beta\text{-2Man}\alpha\text{-6} \\   \\ \text{Man}\beta\text{-4GlcNAc}\beta\text{-4GlcNAc} \\   \\ \text{NeuAc}\alpha\text{-3Gal}\beta\text{-4GlcNAc}\beta\text{-2Man}\alpha\text{-3} \end{array} \quad \begin{array}{c} \text{Fuc}\alpha\text{-6} \\   \\ \text{Man}\beta\text{-4GlcNAc}\beta\text{-4GlcNAc} \end{array}$ | 2 |
| <b>Gangliosides</b> |             |                                                                                                                                                                                                                                                                                                                                                                                                 |   |
| 270                 | GM4         | NeuAc $\alpha$ -3Gal $\beta$ -Cer                                                                                                                                                                                                                                                                                                                                                               | - |
| 271                 | SM3         | SU-3Gal $\beta$ -4Glc $\beta$ -Cer                                                                                                                                                                                                                                                                                                                                                              | - |
| 272                 | Haematoside | NeuAc $\alpha$ -3Gal $\beta$ -4Glc $\beta$ -Cer                                                                                                                                                                                                                                                                                                                                                 | - |
| 273                 | GM3         | NeuAc $\alpha$ -3Gal $\beta$ -4Glc $\beta$ -Cer                                                                                                                                                                                                                                                                                                                                                 | - |
| 274                 | GM3(Gc)     | NeuGc $\alpha$ -3Gal $\beta$ -4Glc-Cer                                                                                                                                                                                                                                                                                                                                                          | - |
| 275                 | Asialo-GM2  | GalNAc $\beta$ -4Gal $\beta$ -4Glc $\beta$ -Cer                                                                                                                                                                                                                                                                                                                                                 | - |
| 276                 | SM2         | $\begin{array}{c} \text{GalNAc}\beta\text{-4Gal}\beta\text{-4Glc}\beta\text{-Cer} \\   \\ \text{SU-3} \end{array}$                                                                                                                                                                                                                                                                              | - |
| 277                 | SB2         | $\begin{array}{c} \text{SU-3GalNAc}\beta\text{-4Gal}\beta\text{-4Glc}\beta\text{-Cer} \\   \\ \text{SU-3} \end{array}$                                                                                                                                                                                                                                                                          | - |
| 278                 | GM2         | $\begin{array}{c} \text{GalNAc}\beta\text{-4Gal}\beta\text{-4Glc}\beta\text{-Cer} \\   \\ \text{NeuAc}\alpha\text{-3} \end{array}$                                                                                                                                                                                                                                                              | - |
| 279                 | GSC-576     | $\begin{array}{c} \text{GalNAc}\beta\text{-4Gal}\beta\text{-3Glc}\beta\text{-C30} \\   \\ \text{NeuAc}\alpha\text{-3} \end{array}$                                                                                                                                                                                                                                                              | - |
| 280                 | GSC-108     | $\begin{array}{c} \text{GalNAc}\beta\text{-4Gal}\beta\text{-4Glc}\beta\text{-Cer36} \\   \\ \text{NeuAc}\alpha\text{-3} \end{array}$                                                                                                                                                                                                                                                            | - |

|     |                    |                                                                                                                                                                                                                                                                                                                              |   |
|-----|--------------------|------------------------------------------------------------------------------------------------------------------------------------------------------------------------------------------------------------------------------------------------------------------------------------------------------------------------------|---|
| 281 | GSC-193            | GalNAc $\beta$ -4Gal $\beta$ -4Glc $\beta$ -Cer36<br> <br>KDN $\alpha$ -3                                                                                                                                                                                                                                                    | - |
| 282 | Asialo-GM1         | Gal $\beta$ -3GalNAc $\beta$ -4Gal $\beta$ -4Glc $\beta$ -Cer                                                                                                                                                                                                                                                                | - |
| 283 | Asialo-GM1-Tetra   | Gal $\beta$ -3GalNAc $\beta$ -4Gal $\beta$ -4Glc                                                                                                                                                                                                                                                                             | 4 |
| 284 | SM1a               | Gal $\beta$ -3GalNAc $\beta$ -4Gal $\beta$ -4Glc $\beta$ -Cer<br> <br>SU-3                                                                                                                                                                                                                                                   | - |
| 285 | SB1a               | SU-3Gal $\beta$ -3GalNAc $\beta$ -4Gal $\beta$ -4Glc $\beta$ -Cer<br> <br>SU-3                                                                                                                                                                                                                                               | - |
| 286 | GM1b               | NeuAc $\alpha$ -3Gal $\beta$ -3GalNAc $\beta$ -4Gal $\beta$ -4Glc $\beta$ -Cer*                                                                                                                                                                                                                                              | - |
| 287 | GSC-335            | SU-6<br> <br>NeuAc $\alpha$ -3Gal $\beta$ -3GalNAc $\beta$ -4Gal $\beta$ -4Glc $\beta$ -Cer36                                                                                                                                                                                                                                | - |
| 288 | GM1                | Gal $\beta$ -3GalNAc $\beta$ -4Gal $\beta$ -4Glc $\beta$ -Cer<br> <br>NeuAc $\alpha$ -3                                                                                                                                                                                                                                      | - |
| 289 | GM1-penta          | Gal $\beta$ -3GalNAc $\beta$ -4Gal $\beta$ -4Glc<br> <br>NeuAc $\alpha$ -3                                                                                                                                                                                                                                                   | - |
| 290 | GM1(Gc)            | Gal $\beta$ -3GalNAc $\beta$ -4Gal $\beta$ -4Glc $\beta$ -Cer<br> <br>NeuGc $\alpha$ -3                                                                                                                                                                                                                                      | - |
| 291 | GM1(Gc)-penta      | Gal $\beta$ -3GalNAc $\beta$ -4Gal $\beta$ -4Glc<br> <br>NeuGc $\alpha$ -3                                                                                                                                                                                                                                                   | 6 |
| 292 | GD1a               | NeuAc $\alpha$ -3Gal $\beta$ -3GalNAc $\beta$ -4Gal $\beta$ -4Glc $\beta$ -Cer<br> <br>NeuAc $\alpha$ -3                                                                                                                                                                                                                     | - |
| 293 | GD1a-hexa          | NeuAc $\alpha$ -3Gal $\beta$ -3GalNAc $\beta$ -4Gal $\beta$ -4Glc<br> <br>NeuAc $\alpha$ -3                                                                                                                                                                                                                                  | - |
| 294 | GalNAc-GD1a(Ac,Gc) | GalNAc $\beta$ -4Gal $\beta$ -3GalNAc $\beta$ -4Gal $\beta$ -4Glc $\beta$ -Cer<br>                        <br>NeuGc $\alpha$ -3            NeuAc $\alpha$ -3<br>GalNAc $\beta$ -4Gal $\beta$ -3GalNAc $\beta$ -4Gal $\beta$ -4Glc $\beta$ -Cer<br>                        <br>NeuAc $\alpha$ -3            NeuGc $\alpha$ -3 | - |
| 295 | GSC-195            | KDN $\alpha$ -3Gal $\beta$ -3GalNAc $\beta$ -4Gal $\beta$ -4Glc $\beta$ -Cer36<br> <br>KDN $\alpha$ -3                                                                                                                                                                                                                       | - |
| 296 | GD3                | NeuAc $\alpha$ -8NeuAc $\alpha$ -3Gal $\beta$ -4Glc $\beta$ -Cer                                                                                                                                                                                                                                                             | - |
| 297 | GD3-tetra          | NeuAc $\alpha$ -8NeuAc $\alpha$ -3Gal $\beta$ -4Glc                                                                                                                                                                                                                                                                          | - |
| 298 | GD3-tetra-AO       | NeuAc $\alpha$ -8NeuAc $\alpha$ -3Gal $\beta$ -4Glc-AO                                                                                                                                                                                                                                                                       | - |



|                                |                          |                                                                                                                                            |    |
|--------------------------------|--------------------------|--------------------------------------------------------------------------------------------------------------------------------------------|----|
| 299                            | GD2                      | GalNAc $\beta$ -4Gal $\beta$ -4Glc $\beta$ -Cer<br> <br>NeuAc $\alpha$ -8NeuAc $\alpha$ -3                                                 | -  |
| 300                            | GD1b                     | Gal $\beta$ -3GalNAc $\beta$ -4Gal $\beta$ -4Glc $\beta$ -Cer<br> <br>NeuAc $\alpha$ -8NeuAc $\alpha$ -3                                   | -  |
| 301                            | GT1a                     | NeuAc $\alpha$ -8NeuAc $\alpha$ -3Gal $\beta$ -3GalNAc $\beta$ -4Gal $\beta$ -4Glc $\beta$ -Cer<br> <br>NeuAc $\alpha$ -3                  | -  |
| 302                            | GT1b                     | NeuAc $\alpha$ -3Gal $\beta$ -3GalNAc $\beta$ -4Gal $\beta$ -4Glc $\beta$ -Cer<br> <br>NeuAc $\alpha$ -8NeuAc $\alpha$ -3                  | 13 |
| 303                            | GQ1b                     | NeuAc $\alpha$ -8NeuAc $\alpha$ -3Gal $\beta$ -3GalNAc $\beta$ -4Gal $\beta$ -4Glc $\beta$ -Cer<br> <br>NeuAc $\alpha$ -8NeuAc $\alpha$ -3 | -  |
| 304                            | GSC-442                  | GalNAc $\beta$ -4Gal $\beta$ -4Glc $\beta$ -Cer <sub>36</sub><br> <br>NeuAc $\alpha$ -6                                                    | -  |
| 305                            | GSC-68                   | NeuAc $\alpha$ -6Gal $\beta$ -3GalNAc $\beta$ -4Gal $\beta$ -4Glc $\beta$ -Cer <sub>36</sub>                                               | -  |
| 306                            | GSC-155                  | Gal $\beta$ -3GalNAc $\beta$ -4Gal $\beta$ -4Glc $\beta$ -Cer <sub>36</sub><br> <br>NeuAc $\alpha$ -6                                      | -  |
| 307                            | GSC-107                  | NeuAc $\alpha$ -6Gal $\beta$ -3GalNAc $\beta$ -4Gal $\beta$ -4Glc $\beta$ -Cer <sub>36</sub><br> <br>NeuAc $\alpha$ -6                     | -  |
| 308                            | GSC-118                  | NeuAc $\alpha$ -3Gal $\beta$ -3GalNAc $\beta$ -4Gal $\beta$ -4Glc $\beta$ -Cer <sub>36</sub><br> <br>NeuAc $\alpha$ -6                     | -  |
| <b><i>O-glycan related</i></b> |                          |                                                                                                                                            |    |
| 309                            | GalNAc-Ser               | GalNAc-Ser                                                                                                                                 | -  |
| 310                            | GalNAc-Thr               | GalNAc-Thr                                                                                                                                 | -  |
| 311                            | BSM-Di-A1-AO             | NeuGc $\alpha$ -6GalNAc-AO                                                                                                                 | -  |
| 312                            | BSM-Di-A2-AO             | NeuAc $\alpha$ -6GalNAc-AO                                                                                                                 | -  |
| 313                            | GalNAc $\alpha$ -3GalNAc | GalNAc $\alpha$ -3GalNAc                                                                                                                   | -  |
| 314                            | Gal $\beta$ -3GalNAc     | Gal $\beta$ -3GalNAc                                                                                                                       | -  |
| 315                            | Gal $\beta$ -3GalNAc-AO  | Gal $\beta$ -3GalNAc-AO                                                                                                                    | 12 |
| 316                            | Gal $\beta$ -6GalNAc     | Gal $\beta$ -6GalNAc                                                                                                                       | -  |
| 317                            | Gal $\beta$ -6GalNAc-AO  | Gal $\beta$ -6GalNAc-AO                                                                                                                    | -  |
| 318                            | Man-Ser                  | Man $\alpha$ -Ser                                                                                                                          | 10 |
| 319                            | Man-Ser-Succ             | Man-Ser-Succ                                                                                                                               | -  |
| 320                            | Man-Thr                  | Man-Thr                                                                                                                                    | -  |
| 321                            | Man-Thr-Succ             | Man-Thr-Succ                                                                                                                               | -  |
| 322                            | A8/1                     | GlcNAc $\alpha$ -4Gal $\beta$ -OX                                                                                                          | 12 |

|                                  |                  |                                                                                                                                               |    |
|----------------------------------|------------------|-----------------------------------------------------------------------------------------------------------------------------------------------|----|
| 323                              | A8/2             | SU-6<br> <br>Fuca-3GlcNAcβ-OY                                                                                                                 | -  |
| 324                              | A15/1            | SU-6GlcNAcβ-OY                                                                                                                                | -  |
| 325                              | A15/3            | GlcNAcα-4Galβ-3Galβ-OX<br> <br>Fuca-2                                                                                                         | -  |
| 326                              | Notch-1          | Fuca-Thr                                                                                                                                      | -  |
| 327                              | Notch-2          | GlcNAcβ-3Fuca-Thr                                                                                                                             | -  |
| 328                              | Notch-3          | Galβ-4GlcNAcβ-3Fuca-Thr                                                                                                                       | -  |
| 329                              | GSC-488          | NeuAcα-3Galβ-3GalNAcβ-C30                                                                                                                     | -  |
| 330                              | GSC-491          | NeuAcα-3Galβ-3 (6-deoxy-6-CH <sub>2</sub> COOH) GalNAcβ-C30                                                                                   | -  |
| 331                              | GSC-489          | SU-6<br> <br>NeuAcα-3Galβ-3GalNAcβ-C30                                                                                                        | -  |
| 332                              | DST              | NeuAcα-3Galβ-3GalNAc<br> <br>NeuAcα-6                                                                                                         | -  |
| 333                              | GSC-490          | NeuAcα-3Galβ-3GalNAcβ-C30<br> <br>NeuAcα-6                                                                                                    | -  |
| 334                              | GlcNAcβ1-2Fuc-AO | GlcNAcβ1-2Fuc-AO                                                                                                                              | -  |
| 335                              | GlcNAcβ1-4Fuc-AO | GlcNAcβ1-4Fuc-AO                                                                                                                              | -  |
| <b>Poly-sialyl</b>               |                  |                                                                                                                                               |    |
| 336                              | SA2(α8)          | NeuAcα-8NeuAc                                                                                                                                 | 12 |
| 337                              | SA3(α8)          | NeuAcα-8NeuAcα-8NeuAc                                                                                                                         | 1  |
| 338                              | SA4(α8)          | NeuAcα-8NeuAcα-8NeuAcα-8NeuAc                                                                                                                 | -  |
| 339                              | SA5(α8)          | NeuAcα-8NeuAcα-8NeuAcα-8NeuAcα-8NeuAc*                                                                                                        | -  |
| 340                              | SA6(α8)          | NeuAcα-8NeuAcα-8NeuAcα-8NeuAcα-8NeuAcα-8NeuAc*                                                                                                | -  |
| 341                              | SA7(α8)          | NeuAcα-8NeuAcα-8NeuAcα-8NeuAcα-8NeuAcα-8NeuAcα-8NeuAc*                                                                                        | -  |
| 342                              | SA8(α8)          | NeuAcα-8NeuAcα-8NeuAcα-8NeuAcα-8NeuAcα-8NeuAc-8NeuAcα-8NeuAc*                                                                                 | -  |
| 343                              | SA9(α8)          | NeuAcα-8NeuAcα-8NeuAcα-8NeuAcα-8NeuAcα-8NeuAc-8NeuAcα-8NeuAc-8NeuAcα*                                                                         | -  |
| 344                              | SA10(α8)         | NeuAcα-8NeuAcα-8NeuAcα-8NeuAcα-8NeuAcα-8NeuAc-8NeuAcα-8NeuAcα-8NeuAcα-8NeuAc*                                                                 | -  |
| <b>Glycosaminoglycan-related</b> |                  |                                                                                                                                               |    |
| 345                              | HA-S4            | GlcAB-3GlcNAcβ-4GlcAB-3GlcNA*                                                                                                                 | -  |
| 346                              | HA-S14           | GlcAB-3GlcNAcβ-4GlcAB-3GlcNAcβ-4GlcAB-3GlcNAcβ-4GlcAB-3GlcNAcβ-4GlcAB-3GlcNAcβ-4GlcAB-3GlcNAcβ-4GlcAB-3GlcNAcβ-4GlcAB-3GlcNAcβ-4GlcAB-3GlcNA* | -  |
| 347                              | Hep-Di IS        | ΔUA-4GlcNS<br>        <br>SU-2    6-SU                                                                                                        | -  |
| 348                              | Hep-Di-IS-AO     | ΔUA-4GlcNS-AO<br>        <br>SU-2    6-SU                                                                                                     | -  |

|                       |                      |                                                                                                                                                                                                                                                                          |    |
|-----------------------|----------------------|--------------------------------------------------------------------------------------------------------------------------------------------------------------------------------------------------------------------------------------------------------------------------|----|
| 349                   | CSA-4                | $\Delta$ UA-3GalNAc $\beta$ -4GlcA $\beta$ -3GalNAc*<br>SU-4 SU-4                                                                                                                                                                                                        | -  |
| 350                   | CSA-14               | $\Delta$ UA-3GalNAc $\beta$ -4GlcA $\beta$ -3GalNAc $\beta$ -4GlcA $\beta$ -3GalNAc $\beta$ -4GlcA $\beta$ -3GalNAc $\beta$ -4GlcA $\beta$ -3GalNAc $\beta$ -4GlcA $\beta$ -<br>SU-4 SU-4 SU-4 SU-4 SU-4<br>-3GalNAc $\beta$ -4GlcA $\beta$ -3GalNAc*<br>SU-4 SU-4       | -  |
| 351                   | CSB-4                | $\Delta$ UA-3GalNAc $\beta$ -4IdoA $\alpha$ -3GalNAc*<br>SU-4 SU-4                                                                                                                                                                                                       | 4  |
| 352                   | CSB-14               | $\Delta$ UA-3GalNAc $\beta$ -4IdoA $\alpha$ -3GalNAc $\beta$ -4IdoA $\alpha$ -3GalNAc $\beta$ -4IdoA $\alpha$ -3GalNAc $\beta$ -4IdoA $\alpha$ -3GalNAc $\beta$ -4IdoA $\alpha$ -<br>SU-4 SU-4 SU-4 SU-4 SU-4<br>-3GalNAc $\beta$ -4IdoA $\alpha$ -3GalNAc*<br>SU-4 SU-4 | 11 |
| 353                   | CSC-4                | $\Delta$ UA-3GalNAc $\beta$ -4GlcA $\beta$ -3GalNAc*<br>SU-6 SU-6                                                                                                                                                                                                        | -  |
| 354                   | CSC-14               | $\Delta$ UA-3GalNAc $\beta$ -4GlcA $\beta$ -3GalNAc $\beta$ -4GlcA $\beta$ -3GalNAc $\beta$ -4GlcA $\beta$ -3GalNAc $\beta$ -4GlcA $\beta$ -3GalNAc $\beta$ -4GlcA $\beta$ -<br>SU-6 SU-6 SU-6 SU-6 SU-6<br>-3GalNAc $\beta$ -4GlcA $\beta$ -3GalNAc*<br>SU-6 SU-6       | 14 |
| <b>Homo-oligomers</b> |                      |                                                                                                                                                                                                                                                                          |    |
| 355                   | GN2                  | GlcNAc $\beta$ -4GlcNAc                                                                                                                                                                                                                                                  | -  |
| 356                   | GN3                  | GlcNAc $\beta$ -4GlcNAc $\beta$ -4GlcNAc                                                                                                                                                                                                                                 | 8  |
| 357                   | Man4( $\beta$ 4)     | Man $\beta$ -4Man $\beta$ -4Man $\beta$ -4Man                                                                                                                                                                                                                            | -  |
| 358                   | Man5( $\beta$ 4)     | Man $\beta$ -4Man $\beta$ -4Man $\beta$ -4Man $\beta$ -4Man                                                                                                                                                                                                              | 7  |
| 359                   | Man6( $\beta$ 4)     | Man $\beta$ -4Man $\beta$ -4Man $\beta$ -4Man $\beta$ -4Man $\beta$ -4Man                                                                                                                                                                                                | -  |
| 360                   | Xyl5( $\beta$ 4)     | Xyl $\beta$ -4Xyl $\beta$ -4Xyl $\beta$ -4Xyl $\beta$ -4Xyl                                                                                                                                                                                                              | -  |
| 361                   | Xyl6( $\beta$ 4)     | Xyl $\beta$ -4Xyl $\beta$ -4Xyl $\beta$ -4Xyl $\beta$ -4Xyl $\beta$ -4Xyl                                                                                                                                                                                                | -  |
| 362                   | Ara6( $\alpha$ 5)    | Ara $\alpha$ -5Ara $\alpha$ -5Ara $\alpha$ -5Ara $\alpha$ -5Ara $\alpha$ -5Ara                                                                                                                                                                                           | 7  |
| 363                   | Ara7( $\alpha$ 5)    | Ara $\alpha$ -5Ara $\alpha$ -5Ara $\alpha$ -5Ara $\alpha$ -5Ara $\alpha$ -5Ara $\alpha$ -5Ara                                                                                                                                                                            | 6  |
| 364                   | Glc2( $\alpha$ 2)-AO | Glc $\alpha$ -2Glc-AO                                                                                                                                                                                                                                                    | -  |
| 365                   | Glc2( $\alpha$ 3)-AO | Glc $\alpha$ -3Glc-AO                                                                                                                                                                                                                                                    | -  |
| 366                   | Malto-2-AO           | Glc $\alpha$ -4Glc-AO                                                                                                                                                                                                                                                    | 6  |
| 367                   | Malto-3-AO           | Glc $\alpha$ -4Glc $\alpha$ -4Glc-AO                                                                                                                                                                                                                                     | 3  |
| 368                   | Malto-4-AO           | Glc $\alpha$ -4Glc $\alpha$ -4Glc $\alpha$ -4Glc-AO                                                                                                                                                                                                                      | -  |
| 369                   | Malto-5-AO           | Glc $\alpha$ -4Glc $\alpha$ -4Glc $\alpha$ -4Glc $\alpha$ -4Glc-AO                                                                                                                                                                                                       | -  |

|     |               |                                                                                 |    |
|-----|---------------|---------------------------------------------------------------------------------|----|
| 370 | Malto-6-AO    | Glcα-4Glcα-4Glcα-4Glcα-4Glcα-4Glc-AO                                            | 18 |
| 371 | Malto-7-AO    | Glcα-4Glcα-4Glcα-4Glcα-4Glcα-4Glcα-4Glc-AO                                      | 15 |
| 372 | Malto-8-AO    | Glcα-4Glcα-4Glcα-4Glcα-4Glcα-4Glcα-4Glcα-4Glc-AO*                               | -  |
| 373 | Malto-9-AO    | Glcα-4Glcα-4Glcα-4Glcα-4Glcα-4Glcα-4Glcα-4Glcα-4Glc-AO*                         | 5  |
| 374 | Malto-10-AO   | Glcα-4Glcα-4Glcα-4Glcα-4Glcα-4Glcα-4Glcα-4Glcα-4Glcα-4Glc-AO*                   | -  |
| 375 | Malto-11-AO   | Glcα-4Glcα-4Glcα-4Glcα-4Glcα-4Glcα-4Glcα-4Glcα-4Glcα-4Glcα-4Glc-AO*             | -  |
| 376 | Malto-12-AO   | Glcα-4Glcα-4Glcα-4Glcα-4Glcα-4Glcα-4Glcα-4Glcα-4Glcα-4Glcα-4Glcα-4Glc-AO*       | 5  |
| 377 | Malto-13-AO   | Glcα-4Glcα-4Glcα-4Glcα-4Glcα-4Glcα-4Glcα-4Glcα-4Glcα-4Glcα-4Glcα-4Glcα-4Glc-AO* | -  |
| 378 | Dextran-2-AO  | Glcα-6Glc-AO                                                                    | 22 |
| 379 | Dextran-3-AO  | Glcα-6Glcα-6Glc-AO                                                              | -  |
| 380 | Dextran-4-AO  | Glcα-6Glcα-6Glcα-6Glc-AO                                                        | -  |
| 381 | Dextran-5-AO  | Glcα-6Glcα-6Glcα-6Glcα-6Glc-AO                                                  | -  |
| 382 | Dextran-6-AO  | Glcα-6Glcα-6Glcα-6Glcα-6Glcα-6Glc-AO                                            | -  |
| 383 | Dextran-7-AO  | Glcα-6Glcα-6Glcα-6Glcα-6Glcα-6Glcα-6Glc-AO                                      | 19 |
| 384 | Dextran-8-AO  | Glcα-6Glcα-6Glcα-6Glcα-6Glcα-6Glcα-6Glcα-6Glc-AO*                               | 6  |
| 385 | Dextran-9-AO  | Glcα-6Glcα-6Glcα-6Glcα-6Glcα-6Glcα-6Glcα-6Glcα-6Glc-AO*                         | 18 |
| 386 | Dextran-10-AO | Glcα-6Glcα-6Glcα-6Glcα-6Glcα-6Glcα-6Glcα-6Glcα-6Glcα-6Glc-AO*                   | -  |
| 387 | Dextran-11-AO | Glcα-6Glcα-6Glcα-6Glcα-6Glcα-6Glcα-6Glcα-6Glcα-6Glcα-6Glcα-6Glc-AO*             | -  |
| 388 | Dextran-12-AO | Glcα-6Glcα-6Glcα-6Glcα-6Glcα-6Glcα-6Glcα-6Glcα-6Glcα-6Glcα-6Glcα-6Glc-AO*       | 9  |
| 389 | Dextran-13-AO | Glcα-6Glcα-6Glcα-6Glcα-6Glcα-6Glcα-6Glcα-6Glcα-6Glcα-6Glcα-6Glcα-6Glcα-6Glc-AO* | 26 |
| 390 | Lam-2-AO      | Glcβ-3Glc-AO                                                                    | -  |
| 391 | Lam-3-AO      | Glcβ-3Glcβ-3Glc-AO                                                              | 15 |
| 392 | Lam-4-AO      | Glcβ-3Glcβ-3Glcβ-3Glc-AO                                                        | -  |
| 393 | Lam-5-AO      | Glcβ-3Glcβ-3Glcβ-3Glcβ-3Glc-AO                                                  | 71 |
| 394 | Lam-6-AO      | Glcβ-3Glcβ-3Glcβ-3Glcβ-3Glcβ-3Glc-AO                                            | -  |
| 395 | Lam-7-AO      | Glcβ-3Glcβ-3Glcβ-3Glcβ-3Glcβ-3Glcβ-3Glc-AO                                      | 22 |
| 396 | Curd-8-AO     | Glcβ-3Glcβ-3Glcβ-3Glcβ-3Glcβ-3Glcβ-3Glcβ-3Glc-AO*                               | 10 |
| 397 | Curd-9-AO     | Glcβ-3Glcβ-3Glcβ-3Glcβ-3Glcβ-3Glcβ-3Glcβ-3Glcβ-3Glc-AO*                         | -  |
| 398 | Curd-10-AO    | Glcβ-3Glcβ-3Glcβ-3Glcβ-3Glcβ-3Glcβ-3Glcβ-3Glcβ-3Glcβ-3Glc-AO*                   | -  |
| 399 | Curd-11-AO    | Glcβ-3Glcβ-3Glcβ-3Glcβ-3Glcβ-3Glcβ-3Glcβ-3Glcβ-3Glcβ-3Glcβ-3Glc-AO*             | -  |
| 400 | Curd-12-AO    | Glcβ-3Glcβ-3Glcβ-3Glcβ-3Glcβ-3Glcβ-3Glcβ-3Glcβ-3Glcβ-3Glcβ-3Glcβ-3Glc-AO*       | 18 |
| 401 | Curd-13-AO    | Glcβ-3Glcβ-3Glcβ-3Glcβ-3Glcβ-3Glcβ-3Glcβ-3Glcβ-3Glcβ-3Glcβ-3Glcβ-3Glcβ-3Glc-AO* | -  |
| 402 | Cello-2-AO    | Glcβ-4Glc-AO                                                                    | -  |
| 403 | Cello-3-AO    | Glcβ-4Glcβ-4Glc-AO                                                              | -  |
| 404 | Cello-4-AO    | Glcβ-4Glcβ-4Glcβ-4Glc-AO                                                        | 13 |
| 405 | Cello-5-AO    | Glcβ-4Glcβ-4Glcβ-4Glcβ-4Glc-AO                                                  | -  |
| 406 | Cello-6-AO    | Glcβ-4Glcβ-4Glcβ-4Glcβ-4Glcβ-4Glc-AO                                            | 12 |
| 407 | Pust-2-AO     | Glcβ-6Glc-AO                                                                    | 7  |

|                      |                  |                                                                           |    |
|----------------------|------------------|---------------------------------------------------------------------------|----|
| 408                  | Pust-3-AO        | Glcβ-6Glcβ-6Glc-AO                                                        | 8  |
| 409                  | Pust-4-AO        | Glcβ-6Glcβ-6Glcβ-6Glc-AO                                                  | 18 |
| 410                  | Pust-5-AO        | Glcβ-6Glcβ-6Glcβ-6Glcβ-6Glc                                               | 11 |
| 411                  | Pust-6-AO        | Glcβ-6Glcβ-6Glcβ-6Glcβ-6Glcβ-6Glc-AO                                      | -  |
| 412                  | Pust-7-AO        | Glcβ-6Glcβ-6Glcβ-6Glcβ-6Glcβ-6Glcβ-6Glc-AO                                | 10 |
| 413                  | Pust-8-AO        | Glcβ-6Glcβ-6Glcβ-6Glcβ-6Glcβ-6Glcβ-6Glcβ-6Glc-AO*                         | -  |
| 414                  | Pust-9-AO        | Glcβ-6Glcβ-6Glcβ-6Glcβ-6Glcβ-6Glcβ-6Glcβ-6Glcβ-6Glc-AO*                   | -  |
| 415                  | Pust-10-AO       | Glcβ-6Glcβ-6Glcβ-6Glcβ-6Glcβ-6Glcβ-6Glcβ-6Glcβ-6Glcβ-6Glc-AO*             | 15 |
| 416                  | Pust-11-AO       | Glcβ-6Glcβ-6Glcβ-6Glcβ-6Glcβ-6Glcβ-6Glcβ-6Glcβ-6Glcβ-6Glcβ-6Glc-AO*       | 21 |
| 417                  | Pust-12-AO       | Glcβ-6Glcβ-6Glcβ-6Glcβ-6Glcβ-6Glcβ-6Glcβ-6Glcβ-6Glcβ-6Glcβ-6Glcβ-6Glc-AO* | 22 |
| <b>Miscellaneous</b> |                  |                                                                           |    |
| 418                  | Gal              | Gal                                                                       | 18 |
| 419                  | Gal-AO           | Gal-AO                                                                    | 5  |
| 420                  | GalNAc           | GalNAc                                                                    | 85 |
| 421                  | GalNAc-AO        | GalNAc-AO                                                                 | -  |
| 422                  | Glc              | Glc                                                                       | 4  |
| 423                  | Glc-AO           | Glc-AO                                                                    | 9  |
| 424                  | GN               | GlcNAc                                                                    | -  |
| 425                  | GN-AO            | GlcNAc-AO                                                                 | -  |
| 426                  | Man              | Man                                                                       | 12 |
| 427                  | Man-AO           | Man-AO                                                                    | -  |
| 428                  | Fuc              | Fuc                                                                       | 59 |
| 429                  | Fuc-AO           | Fuc-AO                                                                    | -  |
| 430                  | NeuAc            | NeuAc                                                                     | -  |
| 431                  | NeuAc-AO         | NeuAc-AO                                                                  | -  |
| 432                  | NeuGc            | NeuGc                                                                     | -  |
| 433                  | NeuGc-AO         | NeuGc-AO                                                                  | 14 |
| 434                  | Rha              | Rha                                                                       | 11 |
| 435                  | Rha-AO           | Rha-AO                                                                    | -  |
| 436                  | Galα-6Glc-AO     | Galα-6Glc-AO                                                              | -  |
| 437                  | (6P)-Glc-AO      | P-6Glc-AO                                                                 | 4  |
| 438                  | (6P)-Man         | P-6Man                                                                    | 28 |
| 439                  | (6P)-Man-AO      | P-6Man-AO                                                                 | 23 |
| 440                  | (6P)-Man5        | P-6Manα-3Manα-3Manα-3Manα-2Man                                            | 5  |
| 441                  | (6P)-Fructose-AO | P-6Fructose-AO                                                            | 3  |
| 442                  | SU-Tyr           | SU-Tyr                                                                    | -  |
| 443                  | GN-Asn           | GlcNAc-Asn                                                                | -  |

|     |                                          |                                                                                                                                                                                                                |   |
|-----|------------------------------------------|----------------------------------------------------------------------------------------------------------------------------------------------------------------------------------------------------------------|---|
| 444 | Xyl3Glc4                                 | $\begin{array}{c} \text{Glc}\beta\text{-4Glc}\beta\text{-4Glc}\beta\text{-4Glc} \\   \quad   \quad   \\ \text{Xyl}\alpha\text{-6} \quad \text{Xyl}\alpha\text{-6} \quad \text{Xyl}\alpha\text{-6} \end{array}$ | 9 |
| 445 | GSC-284                                  | $\begin{array}{c} \text{GalNAc}\beta\text{-6Gal}\beta\text{-4Glc}\beta\text{-Cer36} \\   \\ \text{NeuAc}\alpha\text{-3} \end{array}$                                                                           | - |
| 446 | GSC-575                                  | $\begin{array}{c} \text{GalNAc}\beta\text{-4Gal}\beta\text{-3Gal}\beta\text{-C30} \\   \\ \text{NeuAc}\alpha\text{-3} \end{array}$                                                                             | - |
| 447 | GSC-70                                   | $\text{NeuAc}\alpha\text{-6Gal}\beta\text{-6GalNAc}\beta\text{-4Gal}\beta\text{-4Glc}\beta\text{-Cer36}$                                                                                                       | - |
| 448 | GSC-154                                  | $\begin{array}{c} \text{NeuAc}\alpha\text{-3Gal}\beta\text{-4GlcNAc}\beta\text{-6Gal}\beta\text{-4Glc}\beta\text{-Cer36} \\   \\ \text{Fuc}\alpha\text{-3} \end{array}$                                        | - |
| 449 | GSC-446                                  | $\text{NeuAc}\alpha\text{-3Gal}\beta\text{-4GlcNAc}\beta\text{-6GalNAc}\alpha\text{-3Gal}\beta\text{-4Glc}\text{-C30}$                                                                                         | - |
| 450 | GSC-441                                  | $\text{NeuAc}\alpha\text{-3Gal}\beta\text{-4GlcNAc}\beta\text{-6GalNAc}\alpha\text{-3Gal}\beta\text{-4Glc}\beta\text{-C30}$                                                                                    | - |
| 451 | GSC-384                                  | $\begin{array}{c} \text{NeuAc}\alpha\text{-3Gal}\beta\text{-4GlcNAc}\beta\text{-4GalNAc}\beta\text{-3Gal}\beta\text{-4Glc}\beta\text{-C30} \\   \\ \text{Fuc}\alpha\text{-3} \end{array}$                      | - |
| 452 | Glc( $\alpha$ 6, $\alpha$ 4, $\alpha$ 4) | $\text{Glc}\alpha\text{-6Glc}\alpha\text{-4Glc}\alpha\text{-4Glc}$                                                                                                                                             | - |

**Supplementary Table 1. Glycan microarray binding studies using the neoglycolipid-based microarray.**

The mean fluorescence signal is indicated for each glycan at 7 fmol spots printed in duplicate, as illustrated in Figure 4B. None of the scores are significant.

<sup>a</sup>Pos, Probe position in the microarray.

<sup>b</sup>The oligosaccharide probes are all lipid-linked, neoglycolipids (NGLs) or glycolipids and are from the collection assembled in the course of research in the Glycosciences Laboratory, Imperial College. Unless otherwise specified the NGLs are prepared from reducing oligosaccharides by reductive amination with the amino lipid, 1,2-dihexadecyl-*sn*-glycero-3-phosphoethanolamine (DHPE) (14); AO, NGLs prepared from reducing oligosaccharides by oxime ligation with an aminoxy (AO) functionalized DHPE (15); Cer, natural glycolipids with various ceramide moieties; CerA and CerB denote different natural ceramides; Cer36 and Cer42, synthetic glycolipids with ceramide having a total of 32 and 42 carbon atoms, respectively; C30, a synthetic lipid [2-(tetradecyl)hexadecanol] with 30 carbon atoms. UA, 4,5-unsaturated hexuronic acid; aMan, 2,5-anhydro-mannose; aGal, 3,6-anhydro-galactose.

\*Major component.

| Position | Glycan                                                                          | Fluorescence |
|----------|---------------------------------------------------------------------------------|--------------|
| 1        | Neu5Aca2-8Neu5Acb-Sp17                                                          | 11           |
| 2        | Neu5Aca2-8Neu5Aca2-8Neu5Acb-Sp8                                                 | 21           |
| 3        | Neu5Gcb2-6Galb1-4GlcNAc-Sp8                                                     | 75           |
| 4        | Galb1-3GlcNAcb1-2Mana1-3(Galb1-3GlcNAcb1-2Mana1-6)Manb1-4GlcNAcb1-4GlcNAcb-Sp19 | 16           |
| 5        | Gala-Sp8                                                                        | 16           |
| 6        | Glca-Sp8                                                                        | 15           |
| 7        | Mana-Sp8                                                                        | 11           |
| 8        | GalNAca-Sp8                                                                     | 40           |
| 9        | Fuca-Sp8                                                                        | 16           |
| 10       | Fuca-Sp9                                                                        | 28           |
| 11       | Rha-Sp8                                                                         | 10           |
| 12       | Neu5Aca-Sp8                                                                     | 64           |
| 13       | Neu5Aca-Sp11                                                                    | 13           |
| 14       | Neu5Acb-Sp8                                                                     | 47           |
| 15       | Galb-Sp8                                                                        | 24           |
| 16       | Glc b-Sp8                                                                       | 297          |
| 17       | Manb-Sp8                                                                        | 4            |
| 18       | GalNAcb-Sp8                                                                     | 19           |
| 19       | GlcNAcb-Sp0                                                                     | 30           |
| 20       | GlcNAcb-Sp8                                                                     | 29           |
| 21       | GlcN(Gc)b-Sp8                                                                   | 10           |
| 22       | Galb1-4GlcNAcb1-3(Galb1-4GlcNAcb1-6)GalNAca-Sp8                                 | 22           |
| 23       | GlcNAcb1-3(GlcNAcb1-4)(GlcNAcb1-6)GlcNAc-Sp8                                    | 21           |
| 24       | [3OSO3][6OSO3]Galb1-4[6OSO3]GlcNAcb-Sp0                                         | 97           |
| 25       | [3OSO3][6OSO3]Galb1-4GlcNAcb-Sp0                                                | 25           |
| 26       | [3OSO3]Galb1-4Glc b-Sp8                                                         | 29           |
| 27       | [3OSO3]Galb1-4[6OSO3]Glc b-Sp0                                                  | 32           |
| 28       | [3OSO3]Galb1-4[6OSO3]Glc b-Sp8                                                  | 13           |
| 29       | [3OSO3]Galb1-3(Fuca1-4)GlcNAcb-Sp8                                              | 35           |

|    |                                                                                                     |     |
|----|-----------------------------------------------------------------------------------------------------|-----|
| 30 | [3OSO3]Galb1-3GalNAca-Sp8                                                                           | 31  |
| 31 | [3OSO3]Galb1-3GlcNAcb-Sp8                                                                           | 26  |
| 32 | [3OSO3]Galb1-4(Fuca1-3)GlcNAcb-Sp8                                                                  | 37  |
| 33 | [3OSO3]Galb1-4[6OSO3]GlcNAcb-Sp8                                                                    | 49  |
| 34 | [3OSO3]Galb1-4GlcNAcb-Sp0                                                                           | 17  |
| 35 | [3OSO3]Galb1-4GlcNAcb-Sp8                                                                           | 33  |
| 36 | [3OSO3]Galb-Sp8                                                                                     | 37  |
| 37 | [4OSO3][6OSO3]Galb1-4GlcNAcb-Sp0                                                                    | 26  |
| 38 | [4OSO3]Galb1-4GlcNAcb-Sp8                                                                           | 13  |
| 39 | 6-H2PO3Mana-Sp8                                                                                     | 0   |
| 40 | [6OSO3]Galb1-4Glc-Sp0                                                                               | 50  |
| 41 | [6OSO3]Galb1-4Glc-Sp8                                                                               | 13  |
| 42 | [6OSO3]Galb1-4GlcNAcb-Sp8                                                                           | 49  |
| 43 | [6OSO3]Galb1-4[6OSO3]Glc-Sp8                                                                        | 36  |
| 44 | Neu5Aca2-3[6OSO3]Galb1-4GlcNAcb-Sp8                                                                 | 14  |
| 45 | [6OSO3]GlcNAcb-Sp8                                                                                  | 27  |
| 46 | Neu5Ac(9Ac)a-Sp8                                                                                    | 4   |
| 47 | Neu5Ac(9Ac)a2-6Galb1-4GlcNAcb-Sp8                                                                   | 29  |
| 48 | Mana1-3(Mana1-6)Manb1-4GlcNAcb1-4GlcNAcb-Sp13                                                       | 32  |
| 49 | GlcNAcb1-2Mana1-3(GlcNAcb1-2Mana1-6)Manb1-4GlcNAcb1-4GlcNAcb-Sp13                                   | 37  |
| 50 | Galb1-4GlcNAcb1-2Mana1-3(Galb1-4GlcNAcb1-2Mana1-6)Manb1-4GlcNAcb1-4GlcNAcb-Sp12                     | 13  |
| 51 | Galb1-4GlcNAcb1-2Mana1-3(Galb1-4GlcNAcb1-2Mana1-6)Manb1-4GlcNAcb1-4GlcNAcb-Sp13                     | 70  |
| 52 | Neu5Aca2-6Galb1-4GlcNAcb1-2Mana1-3(Neu5Aca2-6Galb1-4GlcNAcb1-2Mana1-6)Manb1-4GlcNAcb1-4GlcNAcb-Sp12 | 9   |
| 53 | Neu5Aca2-6Galb1-4GlcNAcb1-2Mana1-3(Neu5Aca2-6Galb1-4GlcNAcb1-2Mana1-6)Manb1-4GlcNAcb1-4GlcNAcb-Sp13 | 71  |
| 54 | Neu5Aca2-6Galb1-4GlcNAcb1-2Mana1-3(Neu5Aca2-6Galb1-4GlcNAcb1-2Mana1-6)Manb1-4GlcNAcb1-4GlcNAcb-Sp8  | 119 |
| 55 | Fuca1-2Galb1-3GalNAcb1-3Gala-Sp9                                                                    | 21  |
| 56 | Fuca1-2Galb1-3GalNAcb1-3Gala1-4Galb1-4Glc-Sp9                                                       | 50  |
| 57 | Fuca1-2Galb1-3(Fuca1-4)GlcNAcb-Sp8                                                                  | 9   |
| 58 | Fuca1-2Galb1-3GalNAca-Sp8                                                                           | 18  |
| 59 | Fuca1-2Galb1-3GalNAcb1-4(Neu5Aca2-3)Galb1-4Glc-Sp0                                                  | 25  |
| 60 | Fuca1-2Galb1-3GalNAcb1-4(Neu5Aca2-3)Galb1-4Glc-Sp9                                                  | 19  |
| 61 | Fuca1-2Galb1-3GlcNAcb1-3Galb1-4Glc-Sp10                                                             | 22  |



|    |                                                                                        |    |
|----|----------------------------------------------------------------------------------------|----|
| 62 | Fuca1-2Galb1-3GlcNAcb1-3Galb1-4Glc-Sp8                                                 | 25 |
| 63 | Fuca1-2Galb1-3GlcNAcb-Sp0                                                              | 24 |
| 64 | Fuca1-2Galb1-3GlcNAcb-Sp8                                                              | 4  |
| 65 | Fuca1-2Galb1-4(Fuca1-3)GlcNAcb1-3Galb1-4(Fuca1-3)GlcNAcb-Sp0                           | 21 |
| 66 | Fuca1-2Galb1-4(Fuca1-3)GlcNAcb1-3Galb1-4(Fuca1-3)GlcNAcb1-3Galb1-4(Fuca1-3)GlcNAcb-Sp0 | 19 |
| 67 | Fuca1-2Galb1-4(Fuca1-3)GlcNAcb-Sp0                                                     | 13 |
| 68 | Fuca1-2Galb1-4(Fuca1-3)GlcNAcb-Sp8                                                     | 19 |
| 69 | Fuca1-2Galb1-4GlcNAcb1-3Galb1-4GlcNAcb-Sp0                                             | 22 |
| 70 | Fuca1-2Galb1-4GlcNAcb1-3Galb1-4GlcNAcb1-3Galb1-4GlcNAcb-Sp0                            | 45 |
| 71 | Fuca1-2Galb1-4GlcNAcb-Sp0                                                              | 12 |
| 72 | Fuca1-2Galb1-4GlcNAcb-Sp8                                                              | 16 |
| 73 | Fuca1-2Galb1-4Glc-Sp0                                                                  | 24 |
| 74 | Fuca1-2Galb-Sp8                                                                        | 31 |
| 75 | Fuca1-3GlcNAcb-Sp8                                                                     | 12 |
| 76 | Fuca1-4GlcNAcb-Sp8                                                                     | 10 |
| 77 | Fucb1-3GlcNAcb-Sp8                                                                     | 2  |
| 78 | GalNAca1-3(Fuca1-2)Galb1-3GlcNAcb-Sp0                                                  | 25 |
| 79 | GalNAca1-3(Fuca1-2)Galb1-4(Fuca1-3)GlcNAcb-Sp0                                         | 38 |
| 80 | GalNAca1-3(Fuca1-2)Galb1-4GlcNAcb-Sp0                                                  | 23 |
| 81 | GalNAca1-3(Fuca1-2)Galb1-4GlcNAcb-Sp8                                                  | 23 |
| 82 | GalNAca1-3(Fuca1-2)Galb1-4Glc-Sp0                                                      | 36 |
| 83 | GalNAca1-3(Fuca1-2)Galb-Sp8                                                            | 23 |
| 84 | GalNAca1-3GalNAcb-Sp8                                                                  | 25 |
| 85 | GalNAca1-3Galb-Sp8                                                                     | 23 |
| 86 | GalNAca1-4(Fuca1-2)Galb1-4GlcNAcb-Sp8                                                  | 26 |
| 87 | GalNAcb1-3GalNAca-Sp8                                                                  | -2 |
| 88 | GalNAcb1-3(Fuca1-2)Galb-Sp8                                                            | 11 |
| 89 | GalNAcb1-3Gala1-4Galb1-4GlcNAcb-Sp0                                                    | 17 |
| 90 | GalNAcb1-4(Fuca1-3)GlcNAcb-Sp0                                                         | 19 |
| 91 | GalNAcb1-4GlcNAcb-Sp0                                                                  | 32 |
| 92 | GalNAcb1-4GlcNAcb-Sp8                                                                  | 4  |
| 93 | Gala1-2Galb-Sp8                                                                        | 30 |

|     |                                                       |    |
|-----|-------------------------------------------------------|----|
| 94  | Gala1-3(Fuca1-2)Galb1-3GlcNAcb-Sp0                    | 15 |
| 95  | Gala1-3(Fuca1-2)Galb1-4(Fuca1-3)GlcNAcb-Sp0           | 38 |
| 96  | Gala1-3(Fuca1-2)Galb1-4GlcNAc-Sp0                     | 21 |
| 97  | Gala1-3(Fuca1-2)Galb1-4Glc-Sp0                        | 7  |
| 98  | Gala1-3(Fuca1-2)Galb-Sp8                              | 15 |
| 99  | Gala1-3(Gala1-4)Galb1-4GlcNAcb-Sp8                    | 38 |
| 100 | Gala1-3GalNAca-Sp8                                    | 16 |
| 101 | Gala1-3GalNAcb-Sp8                                    | 21 |
| 102 | Gala1-3Galb1-4(Fuca1-3)GlcNAcb-Sp8                    | 25 |
| 103 | Gala1-3Galb1-3GlcNAcb-Sp0                             | 20 |
| 104 | Gala1-3Galb1-4GlcNAcb-Sp8                             | 37 |
| 105 | Gala1-3Galb1-4Glc-Sp0                                 | 3  |
| 106 | Gala1-3Galb-Sp8                                       | 81 |
| 107 | Gala1-4(Fuca1-2)Galb1-4GlcNAcb-Sp8                    | 14 |
| 108 | Gala1-4Galb1-4GlcNAcb-Sp0                             | 9  |
| 109 | Gala1-4Galb1-4GlcNAcb-Sp8                             | 38 |
| 110 | Gala1-4Galb1-4Glc-Sp0                                 | 20 |
| 111 | Gala1-4GlcNAcb-Sp8                                    | 22 |
| 112 | Gala1-6Glc-Sp8                                        | 34 |
| 113 | Galb1-2Galb-Sp8                                       | 19 |
| 114 | Galb1-3(Fuca1-4)GlcNAcb1-3Galb1-4(Fuca1-3)GlcNAcb-Sp0 | 35 |
| 115 | Galb1-3(Fuca1-4)GlcNAcb1-3Galb1-4GlcNAcb-Sp0          | 2  |
| 116 | Galb1-3(Fuca1-4)GlcNAcb-Sp0                           | 9  |
| 117 | Galb1-3(Fuca1-4)GlcNAc-Sp8                            | 33 |
| 118 | Galb1-3(Fuca1-4)GlcNAcb-Sp8                           | 34 |
| 119 | Galb1-3(Galb1-4GlcNAcb1-6)GalNAca-Sp8                 | 23 |
| 120 | Galb1-3(GlcNAcb1-6)GalNAca-Sp8                        | 25 |
| 121 | Galb1-3(Neu5Aca2-6)GalNAca-Sp8                        | 48 |
| 122 | Galb1-3(Neu5Acb2-6)GalNAca-Sp8                        | 32 |
| 123 | Galb1-3(Neu5Aca2-6)GlcNAcb1-4Galb1-4Glc-Sp10          | 6  |
| 124 | Galb1-3GalNAca-Sp8                                    | 9  |
| 125 | Galb1-3GalNAcb-Sp8                                    | 13 |

|     |                                                                                                     |    |
|-----|-----------------------------------------------------------------------------------------------------|----|
| 126 | Galb1-3GalNAcb1-3Gala1-4Galb1-4GlcB-Sp0                                                             | -2 |
| 127 | Galb1-3GalNAcb1-4(Neu5Aca2-3)Galb1-4GlcB-Sp0                                                        | 27 |
| 128 | Galb1-3GalNAcb1-4Galb1-4GlcB-Sp8                                                                    | 15 |
| 129 | Galb1-3Galb-Sp8                                                                                     | 11 |
| 130 | Galb1-3GlcNAcb1-3Galb1-4GlcNAcb-Sp0                                                                 | 19 |
| 131 | Galb1-3GlcNAcb1-3Galb1-4GlcB-Sp10                                                                   | 16 |
| 132 | Galb1-3GlcNAcb-Sp0                                                                                  | 30 |
| 133 | Galb1-3GlcNAcb-Sp8                                                                                  | 18 |
| 134 | Galb1-4(Fuca1-3)GlcNAcb-Sp0                                                                         | 14 |
| 135 | Galb1-4(Fuca1-3)GlcNAcb-Sp8                                                                         | 4  |
| 136 | Galb1-4(Fuca1-3)GlcNAcb1-4Galb1-4(Fuca1-3)GlcNAcb-Sp0                                               | 55 |
| 137 | Galb1-4(Fuca1-3)GlcNAcb1-4Galb1-4(Fuca1-3)GlcNAcb1-4Galb1-4(Fuca1-3)GlcNAcb-Sp0                     | 15 |
| 138 | Galb1-4[6OSO3]GlcB-Sp0                                                                              | 1  |
| 139 | Galb1-4[6OSO3]GlcB-Sp8                                                                              | 22 |
| 140 | Galb1-4GalNAca1-3(Fuca1-2)Galb1-4GlcNAcb-Sp8                                                        | 29 |
| 141 | Galb1-4GalNAcb1-3(Fuca1-2)Galb1-4GlcNAcb-Sp8                                                        | 40 |
| 142 | Neu5Aca2-3Galb1-4GlcNAcb1-2Mana1-3(Neu5Aca2-3Galb1-4GlcNAcb1-2Mana1-6)Manb1-4GlcNAcb1-4GlcNAcb-Sp12 | 25 |
| 143 | Galb1-4GlcNAcb1-3GalNAca-Sp8                                                                        | 1  |
| 144 | Galb1-4GlcNAcb1-3Galb1-4(Fuca1-3)GlcNAcb1-3Galb1-4(Fuca1-3)GlcNAcb-Sp0                              | 22 |
| 145 | Galb1-4GlcNAcb1-3Galb1-4GlcNAcb1-3Galb1-4GlcNAcb-Sp0                                                | 32 |
| 146 | Galb1-4GlcNAcb1-3Galb1-4GlcNAcb-Sp0                                                                 | 30 |
| 147 | Galb1-4GlcNAcb1-3Galb1-4GlcB-Sp0                                                                    | 11 |
| 148 | Galb1-4GlcNAcb1-3Galb1-4GlcB-Sp8                                                                    | 15 |
| 149 | Galb1-4GlcNAcb1-6(Galb1-3)GalNAca-Sp8                                                               | 12 |
| 150 | Galb1-4GlcNAcb1-6GalNAca-Sp8                                                                        | 69 |
| 151 | Galb1-4GlcNAcb-Sp0                                                                                  | 14 |
| 152 | Galb1-4GlcNAcb-Sp8                                                                                  | 21 |
| 153 | Galb1-4GlcB-Sp0                                                                                     | 20 |
| 154 | Galb1-4GlcB-Sp8                                                                                     | 30 |
| 155 | GlcNAca1-3Galb1-4GlcNAcb-Sp8                                                                        | 16 |
| 156 | GlcNAca1-6Galb1-4GlcNAcb-Sp8                                                                        | 47 |
| 157 | GlcNAcb1-2Galb1-3GalNAca-Sp8                                                                        | 13 |

|     |                                               |     |
|-----|-----------------------------------------------|-----|
| 158 | GlcNAcb1-3(GlcNAcb1-6)GalNAca-Sp8             | -2  |
| 159 | GlcNAcb1-3(GlcNAcb1-6)Galb1-4GlcNAcb-Sp8      | 9   |
| 160 | GlcNAcb1-3GalNAca-Sp8                         | 11  |
| 161 | GlcNAcb1-3Galb-Sp8                            | 18  |
| 162 | GlcNAcb1-3Galb1-3GalNAca-Sp8                  | 59  |
| 163 | GlcNAcb1-3Galb1-4GlcNAcb-Sp0                  | 36  |
| 164 | GlcNAcb1-3Galb1-4GlcNAcb-Sp8                  | 24  |
| 165 | GlcNAcb1-3Galb1-4GlcNAcb1-3Galb1-4GlcNAcb-Sp0 | -10 |
| 166 | GlcNAcb1-3Galb1-4Glc-Sp0                      | 38  |
| 167 | GlcNAcb1-4-MDPLys                             | 8   |
| 168 | GlcNAcb1-4(GlcNAcb1-6)GalNAca-Sp8             | 20  |
| 169 | GlcNAcb1-4Galb1-4GlcNAcb-Sp8                  | 19  |
| 170 | (GlcNAcb1-4)6b-Sp8                            | 11  |
| 171 | (GlcNAcb1-4)5b-Sp8                            | 19  |
| 172 | GlcNAcb1-4GlcNAcb1-4GlcNAcb-Sp8               | 21  |
| 173 | GlcNAcb1-6(Galb1-3)GalNAca-Sp8                | 11  |
| 174 | GlcNAcb1-6GalNAca-Sp8                         | 12  |
| 175 | GlcNAcb1-6Galb1-4GlcNAcb-Sp8                  | 28  |
| 176 | GlcA1-4Glc-Sp8                                | 15  |
| 177 | GlcA1-4Glc-Sp8                                | 10  |
| 178 | GlcA1-6GlcA1-6Glc-Sp8                         | 24  |
| 179 | GlcB1-4Glc-Sp8                                | 9   |
| 180 | GlcB1-6Glc-Sp8                                | 22  |
| 181 | G-ol-Sp8                                      | 17  |
| 182 | GlcAa-Sp8                                     | 26  |
| 183 | GlcAb-Sp8                                     | 28  |
| 184 | GlcAb1-3Galb-Sp8                              | 8   |
| 185 | GlcAb1-6Galb-Sp8                              | 7   |
| 186 | KDNa2-3Galb1-3GlcNAcb-Sp0                     | 43  |
| 187 | KDNa2-3Galb1-4GlcNAcb-Sp0                     | 13  |
| 188 | Mana1-2Mana1-2Mana1-3Mana-Sp9                 | 16  |
| 189 | Mana1-2Mana1-3(Mana1-2Mana1-6)Mana-Sp9        | 20  |

|     |                                                                                                     |    |
|-----|-----------------------------------------------------------------------------------------------------|----|
| 190 | Mana1-2Mana1-3Mana-Sp9                                                                              | 28 |
| 191 | Mana1-6(Mana1-2Mana1-3)Mana1-6(Mana1-2Mana1-3)Manb1-4GlcNAcb1-4GlcNAcb-Sp12                         | 13 |
| 192 | Mana1-2Mana1-6(Mana1-3)Mana1-6(Mana1-2Mana1-2Mana1-3)Manb1-4GlcNAcb1-4GlcNAcb-Sp12                  | 17 |
| 193 | Mana1-2Mana1-2Mana1-3(Mana1-2Mana1-3(Mana1-2Mana1-6)Mana1-6)Manb1-4GlcNAcb1-4GlcNAcb-Sp12           | 10 |
| 194 | Mana1-3(Mana1-6)Mana-Sp9                                                                            | 11 |
| 195 | Mana1-3(Mana1-2Mana1-2Mana1-6)Mana-Sp9                                                              | 22 |
| 196 | Mana1-6(Mana1-3)Mana1-6(Mana1-2Mana1-3)Manb1-4GlcNAcb1-4GlcNAcb-Sp12                                | 7  |
| 197 | Mana1-6(Mana1-3)Mana1-6(Mana1-3)Manb1-4GlcNAcb1-4GlcNAcb-Sp12                                       | 44 |
| 198 | Neu5Aca2-6Galb1-4GlcNAcb1-2Mana1-3(Neu5Aca2-3Galb1-4GlcNAcb1-2Mana1-6)Manb1-4GlcNAcb1-4GlcNAcb-Sp12 | 36 |
| 199 | Manb1-4GlcNAcb-Sp0                                                                                  | 52 |
| 200 | Fuca1-3(Galb1-4)GlcNAcb1-2Mana1-3(Fuca1-3(Galb1-4)GlcNAcb1-2Mana1-6)Manb1-4GlcNAcb1-4GlcNAcb-Sp20   | 4  |
| 201 | Neu5Aca2-3Galb1-3GalNAca-Sp8                                                                        | 11 |
| 202 | Neu5Aca2-8Neu5Aca2-8Neu5Aca2-8Neu5Aca2-3(GalNAcb1-4)Galb1-4Glc-Sp0                                  | 52 |
| 203 | Neu5Aca2-8Neu5Aca2-8Neu5Aca2-3(GalNAcb1-4)Galb1-4Glc-Sp0                                            | 31 |
| 204 | Neu5Aca2-8Neu5Aca2-8Neu5Aca2-3Galb1-4Glc-Sp0                                                        | 18 |
| 205 | Neu5Aca2-8Neu5Aca2-3(GalNAcb1-4)Galb1-4Glc-Sp0                                                      | 8  |
| 206 | Neu5Aca2-8Neu5Aca2-8Neu5Aca-Sp8                                                                     | 11 |
| 207 | Neu5Aca2-3(6-O-Su)Galb1-4(Fuca1-3)GlcNAcb-Sp8                                                       | 71 |
| 208 | Neu5Aca2-3(GalNAcb1-4)Galb1-4GlcNAcb-Sp0                                                            | 35 |
| 209 | Neu5Aca2-3(GalNAcb1-4)Galb1-4GlcNAcb-Sp8                                                            | 16 |
| 210 | Neu5Aca2-3(GalNAcb1-4)Galb1-4Glc-Sp0                                                                | 10 |
| 211 | Neu5Aca2-3(Neu5Aca2-3Galb1-3GalNAcb1-4)Galb1-4Glc-Sp0                                               | 22 |
| 212 | Neu5Aca2-3(Neu5Aca2-6)GalNAca-Sp8                                                                   | 16 |
| 213 | Neu5Aca2-3GalNAca-Sp8                                                                               | 16 |
| 214 | Neu5Aca2-3GalNAcb1-4GlcNAcb-Sp0                                                                     | 21 |
| 215 | Neu5Aca2-3Galb1-3[6OSO3]GlcNAc-Sp8                                                                  | 15 |
| 216 | Neu5Aca2-3Galb1-3(Fuca1-4)GlcNAcb-Sp8                                                               | 18 |
| 217 | Neu5Aca2-3Galb1-3(Fuca1-4)GlcNAcb1-3Galb1-4(Fuca1-3)GlcNAcb-Sp0                                     | 44 |
| 218 | Neu5Aca2-3Galb1-3(Neu5Aca2-3Galb1-4)GlcNAcb-Sp8                                                     | 15 |
| 219 | Neu5Aca2-3Galb1-3[6OSO3]GalNAca-Sp8                                                                 | 12 |
| 220 | Neu5Aca2-3Galb1-3(Neu5Aca2-6)GalNAca-Sp8                                                            | 44 |
| 221 | Neu5Aca2-3Galb-Sp8                                                                                  | 19 |

|     |                                                                                           |    |
|-----|-------------------------------------------------------------------------------------------|----|
| 222 | Neu5Aca2-3Galb1-3GalNAcb1-3Gala1-4Galb1-4Glc b-Sp0                                        | 14 |
| 223 | Neu5Aca2-3Galb1-3GlcNAcb1-3Galb1-4GlcNAcb-Sp0                                             | 32 |
| 224 | Neu5Aca2-3Galb1-3GlcNAcb-Sp0                                                              | 14 |
| 225 | Neu5Aca2-3Galb1-3GlcNAcb-Sp8                                                              | 25 |
| 226 | Neu5Aca2-3Galb1-4[6OSO3]GlcNAcb-Sp8                                                       | 27 |
| 227 | Neu5Aca2-3Galb1-4(Fuca1-3)[6OSO3]GlcNAcb-Sp8                                              | 9  |
| 228 | Neu5Aca2-3Galb1-4(Fuca1-3)GlcNAcb1-3Galb1-4(Fuca1-3)GlcNAcb1-3Galb1-4(Fuca1-3)GlcNAcb-Sp0 | 1  |
| 229 | Neu5Aca2-3Galb1-4(Fuca1-3)GlcNAcb-Sp0                                                     | 29 |
| 230 | Neu5Aca2-3Galb1-4(Fuca1-3)GlcNAcb-Sp8                                                     | 27 |
| 231 | Neu5Aca2-3Galb1-4(Fuca1-3)GlcNAcb1-3Galb-Sp8                                              | 17 |
| 232 | Neu5Aca2-3Galb1-4(Fuca1-3)GlcNAcb1-3Galb1-4GlcNAcb-Sp8                                    | 60 |
| 233 | Neu5Aca2-3Galb1-4GlcNAcb1-3Galb1-4(Fuca1-3)GlcNAc-Sp0                                     | 26 |
| 234 | Neu5Aca2-3Galb1-4GlcNAcb1-3Galb1-4GlcNAcb1-3Galb1-4GlcNAcb-Sp0                            | 16 |
| 235 | Neu5Aca2-3Galb1-4GlcNAcb-Sp0                                                              | 21 |
| 236 | Neu5Aca2-3Galb1-4GlcNAcb-Sp8                                                              | 23 |
| 237 | Neu5Aca2-3Galb1-4GlcNAcb1-3Galb1-4GlcNAcb-Sp0                                             | 10 |
| 238 | Neu5Aca2-3Galb1-4Glc b-Sp0                                                                | 9  |
| 239 | Neu5Aca2-3Galb1-4Glc b-Sp8                                                                | 8  |
| 240 | Neu5Aca2-6GalNAca-Sp8                                                                     | 7  |
| 241 | Neu5Aca2-6GalNAcb1-4GlcNAcb-Sp0                                                           | 10 |
| 242 | Neu5Aca2-6Galb1-4[6OSO3]GlcNAcb-Sp8                                                       | 27 |
| 243 | Neu5Aca2-6Galb1-4GlcNAcb-Sp0                                                              | 33 |
| 244 | Neu5Aca2-6Galb1-4GlcNAcb-Sp8                                                              | 4  |
| 245 | Neu5Aca2-6Galb1-4GlcNAcb1-3Galb1-4(Fuca1-3)GlcNAcb1-3Galb1-4(Fuca1-3)GlcNAcb-Sp0          | 15 |
| 246 | Neu5Aca2-6Galb1-4GlcNAcb1-3Galb1-4GlcNAcb-Sp0                                             | 21 |
| 247 | Neu5Aca2-6Galb1-4Glc b-Sp0                                                                | 18 |
| 248 | Neu5Aca2-6Galb1-4Glc b-Sp8                                                                | 22 |
| 249 | Neu5Aca2-6Galb-Sp8                                                                        | 28 |
| 250 | Neu5Aca2-8Neu5Aca-Sp8                                                                     | 26 |
| 251 | Neu5Aca2-8Neu5Aca2-3Galb1-4Glc b-Sp0                                                      | 16 |
| 252 | Neu5Acb2-6GalNAca-Sp8                                                                     | 22 |
| 253 | Neu5Acb2-6Galb1-4GlcNAcb-Sp8                                                              | 11 |

|     |                                                       |     |
|-----|-------------------------------------------------------|-----|
| 254 | Neu5Gca2-3Galb1-3(Fuca1-4)GlcNAcb-Sp0                 | 14  |
| 255 | Neu5Gca2-3Galb1-3GlcNAcb-Sp0                          | 16  |
| 256 | Neu5Gca2-3Galb1-4(Fuca1-3)GlcNAcb-Sp0                 | 31  |
| 257 | Neu5Gca2-3Galb1-4GlcNAcb-Sp0                          | 30  |
| 258 | Neu5Gca2-3Galb1-4Glc-Sp0                              | 9   |
| 259 | Neu5Gca2-6GalNAca-Sp0                                 | 8   |
| 260 | Neu5Gca2-6Galb1-4GlcNAcb-Sp0                          | 37  |
| 261 | Neu5Gca-Sp8                                           | 106 |
| 262 | [3OSO3]Galb1-4(Fuca1-3)[6OSO3]Glc-Sp0                 | 35  |
| 263 | [3OSO3]Galb1-4(Fuca1-3)Glc-Sp0                        | 17  |
| 264 | [3OSO3]Galb1-4(Fuca1-3)[6OSO3]GlcNAc-Sp8              | 27  |
| 265 | [3OSO3]Galb1-4(Fuca1-3)GlcNAc-Sp0                     | 20  |
| 266 | Fuca1-2[6OSO3]Galb1-4GlcNAc-Sp0                       | 47  |
| 267 | Fuca1-2Galb1-4[6OSO3]GlcNAc-Sp8                       | 19  |
| 268 | Fuca1-2[6OSO3]Galb1-4[6OSO3]Glc-Sp0                   | -1  |
| 269 | Fuca1-2[6OSO3]Galb1-4Glc-Sp0                          | 34  |
| 270 | Fuca1-2Galb1-4[6OSO3]Glc-Sp0                          | 25  |
| 271 | Galb1-3(Fuca1-4)GlcNAcb1-3Galb1-3(Fuca1-4)GlcNAcb-Sp0 | 22  |
| 272 | Galb1-3(Galb1-4GlcNacb1-6)GalNAc-Sp14                 | 12  |
| 273 | Galb1-3(GlcNacb1-6)GalNAc-Sp14                        | 19  |
| 274 | Galb1-3(Neu5Aca2-3Galb1-4GlcNacb1-6)GalNAca-Sp14      | 7   |
| 275 | Galb1-3GalNAca-Sp14                                   | 19  |
| 276 | Galb1-3GlcNAcb1-3Galb1-3GlcNAcb-Sp0                   | 27  |
| 277 | Galb1-4(Fuca1-3)[6OSO3]GlcNAc-Sp0                     | 58  |
| 278 | Galb1-4(Fuca1-3)[6OSO3]Glc-Sp0                        | 19  |
| 279 | Galb1-4(Fuca1-3)GlcNAcb1-3Galb1-3(Fuca1-4)GlcNAcb-Sp0 | 10  |
| 280 | Galb1-4GlcNAcb1-3Galb1-3GlcNAcb-Sp0                   | 60  |
| 281 | Neu5Aca2-3Galb1-3GlcNAcb1-3Galb1-3GlcNAcb-Sp0         | 27  |
| 282 | Neu5Aca2-3Galb1-4GlcNAcb1-3Galb1-3GlcNAcb-Sp0         | 23  |
| 283 | [3OSO3]Galb1-4[6OSO3]GlcNAcb-Sp0                      | 11  |
| 284 | [3OSO3][4OSO3]Galb1-4GlcNAcb-Sp0                      | 7   |
| 285 | [6OSO3]Galb1-4[6OSO3]GlcNAcb-Sp0                      | 39  |

|     |                                                                                                     |    |
|-----|-----------------------------------------------------------------------------------------------------|----|
| 286 | 6-H2PO3GlcB-Sp10                                                                                    | 15 |
| 287 | Gala1-3(Fuca1-2)GalB-Sp18                                                                           | 21 |
| 288 | Gala1-3GalNAca-Sp16                                                                                 | 5  |
| 289 | GalB1-3GalNAca-Sp16                                                                                 | 17 |
| 290 | GalB1-3(Neu5Aca2-3GalB1-4(Fuca1-3)GlcNAcb1-6)GalNAca-Sp14                                           | 64 |
| 291 | GalB1-3GalB1-4GlcNAcb-Sp8                                                                           | 34 |
| 292 | GalB1-4GlcNAcb1-2Mana1-3(Neu5Aca2-6GalB1-4GlcNAcb1-2Mana1-6)Manb1-4GlcNAcb1-4GlcNAcb-Sp12           | 35 |
| 293 | GalB1-4GlcNAcb1-3(GalB1-4GlcNAcb1-6)GalB1-4GlcNAc-Sp0                                               | 18 |
| 294 | GalB1-4GlcNAcb1-3(GlcNAcb1-6)GalB1-4GlcNAc-Sp0                                                      | 23 |
| 295 | GalB1-4GlcNAca1-6GalB1-4GlcNAcb-Sp0                                                                 | 33 |
| 296 | GalB1-4GlcNAcb1-6GalB1-4GlcNAcb-Sp0                                                                 | 37 |
| 297 | GalNAca1-3(Fuca1-2)GalB-Sp18                                                                        | 24 |
| 298 | GalNAca-Sp15                                                                                        | 12 |
| 299 | GalNAcb1-3GalB-Sp8                                                                                  | 40 |
| 300 | GlcAb1-3GlcNAcb-Sp8                                                                                 | 16 |
| 301 | GlcNAcb1-2Mana1-3(Neu5Aca2-6GalB1-4GlcNAcb1-2Mana1-6)Manb1-4GlcNAcb1-4GlcNAcb-Sp12                  | 21 |
| 302 | GlcNAcb1-2Mana1-3(GlcNAcb1-2Mana1-6)Manb1-4GlcNAcb1-4GlcNAcb-Sp12                                   | 7  |
| 303 | GlcNAcb1-3Man-Sp10                                                                                  | 21 |
| 304 | GlcNAcb1-4GlcNAcb-Sp10                                                                              | 3  |
| 305 | GlcNAcb1-4GlcNAcb-Sp12                                                                              | 21 |
| 306 | HOOC(CH3)CH-3-O-GlcNAcb1-4GlcNAcb-Sp10                                                              | 0  |
| 307 | Mana1-3(Mana1-6)Manb1-4GlcNAcb1-4GlcNAcb-Sp12                                                       | 28 |
| 308 | Mana1-6Manb-Sp10                                                                                    | 21 |
| 309 | Mana1-6(Mana1-3)Mana1-6(Mana1-3)Manb-Sp10                                                           | 14 |
| 310 | Mana1-2Mana1-2Mana1-3(Mana1-2Mana1-6(Mana1-3)Mana1-6)Mana-Sp9                                       | 15 |
| 311 | Mana1-2Mana1-2Mana1-3(Mana1-2Mana1-6(Mana1-2Mana1-3)Mana1-6)Mana-Sp9                                | 35 |
| 312 | Neu5Aca2-3GalB1-3(Neu5Aca2-3GalB1-4GlcNAcb1-6)GalNAca-Sp14                                          | 25 |
| 313 | Neu5Aca2-3GalB1-3(Neu5Aca2-6)GalNAca-Sp14                                                           | 49 |
| 314 | Neu5Aca2-3GalB1-3GalNAca-Sp14                                                                       | 36 |
| 315 | Neu5Aca2-3GalB1-4GlcNAcb1-2Mana1-3(Neu5Aca2-6GalB1-4GlcNAcb1-2Mana1-6)Manb1-4GlcNAcb1-4GlcNAcb-Sp12 | 38 |
| 316 | Neu5Aca2-6GalB1-4GlcNAcb1-2Mana1-3(GalB1-4GlcNAcb1-2Mana1-6)Manb1-4GlcNAcb1-4GlcNAcb-Sp12           | 38 |
| 317 | Neu5Aca2-6GalB1-4GlcNAcb1-2Mana1-3(GlcNAcb1-2Mana1-6)Manb1-4GlcNAcb1-4GlcNAcb-Sp12                  | 20 |



|     |                                                                                                         |     |
|-----|---------------------------------------------------------------------------------------------------------|-----|
| 318 | Neu5Aca2-6Galb1-4GlcNAcb1-2Mana1-3(Neu5Aca2-6Galb1-4GlcNAcb1-2Mana1-6)Manb1-4GlcNAcb1-4GlcNAcb-N(LT)AVL | 98  |
| 319 | Fuca1-2Galb1-3GalNAca-Sp14                                                                              | 7   |
| 320 | Galb1-3(Neu5Aca2-6)GalNAca-Sp14                                                                         | 13  |
| 321 | Galb1-4GlcNAcb1-3GalNAc-Sp14                                                                            | 21  |
| 322 | Neu5Ac(9Ac)a2-3Galb1-4GlcNAcb-Sp0                                                                       | 30  |
| 323 | Neu5Ac(9Ac)a2-3Galb1-3GlcNAcb-Sp0                                                                       | 20  |
| 324 | Neu5Aca2-6Galb1-4GlcNAcb1-3Galb1-3GlcNAcb-Sp0                                                           | 46  |
| 325 | Neu5Aca2-3Galb1-3(Fuca1-4)GlcNAcb1-3Galb1-3(Fuca1-4)GlcNAcb-Sp0                                         | 14  |
| 326 | Neu5Aca2-6Galb1-4GlcNAcb1-3Galb1-4GlcNAcb1-3Galb1-4GlcNAcb-Sp0                                          | 20  |
| 327 | Gala1-4Galb1-4GlcNAcb1-3Galb1-4Glc-Sp0                                                                  | 15  |
| 328 | GalNAcb1-3Gala1-4Galb1-4GlcNAcb1-3Galb1-4Glc-Sp0                                                        | 13  |
| 329 | GalNAca1-3(Fuca1-2)Galb1-4GlcNAcb1-3Galb1-4GlcNAcb-Sp0                                                  | 63  |
| 330 | GalNAca1-3(Fuca1-2)Galb1-4GlcNAcb1-3Galb1-4GlcNAcb1-3Galb1-4GlcNAcb-Sp0                                 | 13  |
| 331 | (Neu5Aca2-3-Galb1-3)(((Neu5Aca2-3-Galb1-4(Fuca1-3))GlcNAcb1-6)GalNAc-Sp14                               | 31  |
| 332 | GlcNAca1-4Galb1-4GlcNAcb1-3Galb1-4GlcNAcb1-3Galb1-4GlcNAcb-Sp0                                          | 19  |
| 333 | GlcNAca1-4Galb1-4GlcNAcb-Sp0                                                                            | 21  |
| 334 | GlcNAca1-4Galb1-3GlcNAcb-Sp0                                                                            | 6   |
| 335 | GlcNAca1-4Galb1-4GlcNAcb1-3Galb1-4Glc-Sp0                                                               | 24  |
| 336 | GlcNAca1-4Galb1-4GlcNAcb1-3Galb1-4(Fuca1-3)GlcNAcb1-3Galb1-4(Fuca1-3)GlcNAcb-Sp0                        | 118 |
| 337 | GlcNAca1-4Galb1-4GlcNAcb1-3Galb1-4GlcNAcb-Sp0                                                           | 21  |
| 338 | GlcNAca1-4Galb1-3GalNAc-Sp14                                                                            | 26  |
| 339 | Mana1-3(Neu5Aca2-6Galb1-4GlcNAcb1-2Mana1-6)Manb1-4GlcNAcb1-4GlcNAc-Sp12                                 | 34  |
| 340 | Neu5Aca2-6Galb1-4GlcNAcb1-2Mana1-3(Mana1-6)Manb1-4GlcNAcb1-4GlcNAc-Sp12                                 | 19  |
| 341 | Neu5Aca2-6Galb1-4GlcNAcb1-2Mana1-6Manb1-4GlcNAcb1-4GlcNAc-Sp12                                          | 7   |
| 342 | Neu5Aca2-6Galb1-4GlcNAcb1-2Mana1-3Manb1-4GlcNAcb1-4GlcNAc-Sp12                                          | 20  |
| 343 | Galb1-4GlcNAcb1-2Mana1-3Manb1-4GlcNAcb1-4GlcNAc-Sp12                                                    | 27  |
| 344 | Galb1-4GlcNAcb1-2Mana1-6Manb1-4GlcNAcb1-4GlcNAc-Sp12                                                    | 21  |
| 345 | Galb1-4GlcNAcb1-2Mana1-3(Mana1-6)Manb1-4GlcNAcb1-4GlcNAcb-Sp12                                          | 38  |
| 346 | GlcNAcb1-2Mana1-3(GlcNAcb1-2Mana1-6)Manb1-4GlcNAcb1-4(Fuca1-6)GlcNAcb-Sp22                              | 32  |
| 347 | Galb1-4GlcNAcb1-2Mana1-3(Galb1-4GlcNAcb1-2Mana1-6)Manb1-4GlcNAcb1-4(Fuca1-6)GlcNAcb-Sp22                | 17  |
| 348 | Galb1-3GlcNAcb1-2Mana1-3(Galb1-3GlcNAcb1-2Mana1-6)Manb1-4GlcNAcb1-4(Fuca1-6)GlcNAcb-Sp22                | 27  |
| 349 | Galb1-3(Fuca1-4)GlcNAcb1-2Mana1-3(Galb1-3(Fuca1-4)GlcNAcb1-2Mana1-6)Manb1-4GlcNAcb1-4GlcNAcb-Sp19       | 58  |

|     |                                                                                                                       |     |
|-----|-----------------------------------------------------------------------------------------------------------------------|-----|
| 350 | [6OSO3]GlcNAcb1-3Gal b1-4GlcNAc-b-Sp0                                                                                 | 32  |
| 351 | KDNa2-3Galb1-4(Fuca1-3)GlcNAc-Sp0                                                                                     | 34  |
| 352 | KDNa2-6Galb1-4GlcNAc-Sp0                                                                                              | 23  |
| 353 | KDNa2-3Galb1-4Glc-Sp0                                                                                                 | 24  |
| 354 | KDNa2-3Galb1-3GalNAca-Sp14                                                                                            | 63  |
| 355 | Fuca1-2Galb1-3GlcNAcb1-2Mana1-3(Fuca1-2Galb1-3GlcNAcb1-2Mana1-6)Manb1-4GlcNAcb1-4GlcNAcb-Sp20                         | 29  |
| 356 | Fuca1-2Galb1-4GlcNAcb1-2Mana1-3(Fuca1-2Galb1-4GlcNAcb1-2Mana1-6)Manb1-4GlcNAcb1-4GlcNAcb-Sp20                         | 21  |
| 357 | Fuca1-2Galb1-4(Fuca1-3)GlcNAcb1-2Mana1-3(Fuca1-2Galb1-4(Fuca1-3)GlcNAcb1-2Mana1-6)Manb1-4GlcNAcb1-4GlcNAcb-Sp20       | 38  |
| 358 | Gala1-3Galb1-4GlcNAcb1-2Mana1-3(Gala1-3Galb1-4GlcNAcb1-2Mana1-6)Manb1-4GlcNAcb1-4GlcNAcb-Sp20                         | 76  |
| 359 | Mana1-3(Galb1-4GlcNAcb1-2Mana1-6)Manb1-4GlcNAcb1-4GlcNAcb-Sp12                                                        | 25  |
| 360 | Galb1-3(Fuca1-4)GlcNAcb1-2Mana1-3(Galb1-3(Fuca1-4)GlcNAcb1-2Mana1-6)Manb1-4GlcNAcb1-4(Fuca1-6)GlcNAcb-Sp22            | 35  |
| 361 | Neu5Aca2-6GlcNAcb1-4GlcNAc-Sp21                                                                                       | 15  |
| 362 | Neu5Aca2-6GlcNAcb1-4GlcNAcb1-4GlcNAc-Sp21                                                                             | 26  |
| 363 | Fuca1-2Galb1-3GlcNAcb1-3(Galb1-4(Fuca1-3)GlcNAcb1-6)Galb1-4Glc-Sp21                                                   | 40  |
| 364 | Galb1-4GlcNAcb1-2(Galb1-4GlcNAcb1-4)Mana1-3(Galb1-4GlcNAcb1-2Mana1-6)Manb1-4GlcNAcb1-4GlcNAc-Sp21                     | 25  |
| 365 | GalNAca1-3(Fuca1-2)Galb1-4GlcNAcb1-2Mana1-3(GalNAca1-3(Fuca1-2)Galb1-4GlcNAcb1-2Mana1-6)Manb1-4GlcNAcb1-4GlcNAcb-Sp20 | 47  |
| 366 | Gala1-3(Fuca1-2)Galb1-4GlcNAcb1-2Mana1-3(Gala1-3(Fuca1-2)Galb1-4GlcNAcb1-2Mana1-6)Manb1-4GlcNAcb1-4GlcNAcb-Sp20       | 37  |
| 367 | Gala1-3Galb1-4(Fuca1-3)GlcNAcb1-2Mana1-3(Gala1-3Galb1-4(Fuca1-3)GlcNAcb1-2Mana1-6)Manb1-4GlcNAcb1-4GlcNAcb-Sp20       | 26  |
| 368 | GalNAca1-3(Fuca1-2)Galb1-3GlcNAcb1-2Mana1-3(GalNAca1-3(Fuca1-2)Galb1-3GlcNAcb1-2Mana1-6)Manb1-4GlcNAcb1-4GlcNAcb-Sp20 | 20  |
| 369 | Gala1-3(Fuca1-2)Galb1-3GlcNAcb1-2Mana1-3(Gala1-3(Fuca1-2)Galb1-3GlcNAcb1-2Mana1-6)Manb1-4GlcNAcb1-4GlcNAcb-Sp20       | 21  |
| 370 | Fuca1-2Galb1-3(Fuca1-4)GlcNAcb1-2Mana1-3(Fuca1-2Galb1-3(Fuca1-4)GlcNAcb1-2Mana1-6)Manb1-4GlcNAcb1-4GlcNAcb-Sp19       | 41  |
| 371 | NeuAca2-3Galb1-4GlcNAcb1-3GalNAc-Sp14                                                                                 | 30  |
| 372 | NeuAca2-6Galb1-4GlcNAcb1-3GalNAc-Sp14                                                                                 | 25  |
| 373 | Neu5Aca2-3Galb1-4(Fuca1-3)GlcNAcb1-3GalNAca-Sp14                                                                      | 107 |
| 374 | GalNAcb1-4GlcNAcb1-2Mana1-6(GalNAcb1-4GlcNAcb1-2Mana1-6)Manb1-4GlcNAcb1-4GlcNAc-Sp12                                  | 60  |
| 375 | Galb1-3GalNAca1-3(Fuca1-2)Galb1-4Glc-Sp14                                                                             | 44  |
| 376 | Galb1-3GalNAca1-3(Fuca1-2)Galb1-4GlcNAc-Sp14                                                                          | 45  |
| 377 | GlcNAcb1-3GalNAca-Sp14                                                                                                | 24  |
| 378 | GlcNAcb1-6GalNAca-Sp14                                                                                                | 46  |
| 379 | Galb1-3GlcNAcb1-3(Galb1-3GlcNAcb1-3Galb1-4GlcNAcb1-6)Galb1-4Glc-Sp0                                                   | 36  |
| 380 | Galb1-3GlcNAcb1-3(Galb1-4(Fuca1-3)GlcNAcb1-6)Galb1-4Glc-Sp21                                                          | 23  |
| 381 | Fuca1-2Galb1-3(Fuca1-4)GlcNAcb1-3(Galb1-4GlcNAcb1-6)Galb1-4Glc-Sp21                                                   | 6   |

|     |                                                                                                                       |    |
|-----|-----------------------------------------------------------------------------------------------------------------------|----|
| 382 | Fuca1-2Galb1-3(Fuca1-4)GlcNAcb1-3(Galb1-4(Fuca1-3)GlcNAcb1-6)Galb1-4Glc-Sp21                                          | 16 |
| 383 | Galb1-3GlcNAcb1-3(Galb1-3GlcNAcb1-3Galb1-4(Fuca1-3)GlcNAcb1-6)Galb1-4Glc-Sp21                                         | 30 |
| 384 | Galb1-4GlcNAcb1-2(Galb1-4GlcNAcb1-4)Mana1-3(Galb1-4GlcNAcb1-2(Galb1-4GlcNAcb1-6)Mana1-6)Manb1-4GlcNAcb1-4GlcNAcb-Sp21 | 41 |
| 385 | GlcNAcb1-2(GlcNAcb1-4)Mana1-3(GlcNAcb1-2Mana1-6)Manb1-4GlcNAcb1-4GlcNAcb-Sp21                                         | 18 |
| 386 | Fuca1-2Galb1-3GalNAca1-3(Fuca1-2)Galb1-4Glc-Sp0                                                                       | 12 |
| 387 | Fuca1-2Galb1-3GalNAca1-3(Fuca1-2)Galb1-4GlcNAcb-Sp0                                                                   | 19 |
| 388 | Galb1-3GlcNAcb1-3GalNAca-Sp14                                                                                         | 20 |
| 389 | Neu5Aca2-3(GalNAcb1-4)Galb1-4GlcNAcb1-3GalNAca-Sp14                                                                   | 12 |
| 390 | GalNAca1-3(Fuca1-2)Galb1-3GalNAca1-3(Fuca1-2)Galb1-4GlcNAcb-Sp0                                                       | 33 |
| 391 | Gala1-3Galb1-3GlcNAcb1-2Mana1-3(Gala1-3Galb1-3GlcNAcb1-2Mana1-6)Manb1-4GlcNAcb1-4GlcNAcb-Sp19                         | 36 |
| 392 | Gala1-3Galb1-3(Fuca1-4)GlcNAcb1-2Mana1-3(Gala1-3Galb1-3(Fuca1-4)GlcNAcb1-2Mana1-6)Manb1-4GlcNAcb1-4GlcNAcb-Sp19       | 15 |
| 393 | Neu5Aca2-3Galb1-3GlcNAcb1-2Mana1-3(Neu5Aca2-3Galb1-3GlcNAcb1-2Mana1-6)Manb1-4GlcNAcb1-4GlcNAcb-Sp19                   | 6  |
| 394 | Galb1-4GlcNAcb1-2Mana1-3(GlcNAcb1-2Mana1-6)Manb1-4GlcNAcb1-4GlcNAcb-Sp12                                              | 21 |
| 395 | GlcNAcb1-2Mana1-3(Galb1-4GlcNAcb1-2Mana1-6)Manb1-4GlcNAcb1-4GlcNAcb-Sp12                                              | 20 |
| 396 | Neu5Aca2-3Galb1-3GlcNAcb1-3GalNAca-Sp14                                                                               | 22 |
| 397 | Fuca1-2Galb1-4GlcNAcb1-3GalNAca-Sp14                                                                                  | 26 |
| 398 | Galb1-4(Fuca1-3)GlcNAcb1-3GalNAca-Sp14                                                                                | 36 |
| 399 | GalNAca1-3GalNAcb1-3Gala1-4Galb1-4GlcNAcb-Sp0                                                                         | 8  |
| 400 | Gala1-4Galb1-3GlcNAcb1-2Mana1-3(Gala1-4Galb1-3GlcNAcb1-2Mana1-6)Manb1-4GlcNAcb1-4GlcNAcb-Sp19                         | 81 |
| 401 | Gala1-4Galb1-4GlcNAcb1-2Mana1-3(Gala1-4Galb1-4GlcNAcb1-2Mana1-6)Manb1-4GlcNAcb1-4GlcNAcb-LVNKT                        | 37 |
| 402 | Gala1-3Galb1-4GlcNAcb1-3GalNAca-Sp14                                                                                  | 32 |
| 403 | Galb1-3GlcNAcb1-6Galb1-4GlcNAcb-Sp0                                                                                   | 24 |
| 404 | Galb1-3GlcNAca1-6Galb1-4GlcNAcb-Sp0                                                                                   | 12 |
| 405 | GalNAcb1-3Gala1-6Galb1-4Glc-Sp8                                                                                       | 4  |
| 406 | GlcNAcb1-6(GlcNAcb1-3)GalNAca-Sp14                                                                                    | 15 |

### Supplementary Table 2. Glycan microarray binding studies using the Consortium for Functional Genomics (CFG) microarray

The position of each glycan is indicated and the fluorescence score with CLEC5A as illustrated in Figure 4C. None of the scores are significant. *N*-glycan-related sequences with a variety of spacer arms/linkers\* are included among the 406 glycan probes in this CFG array version 3.2 (<http://www.functionalglycomics.org/static/consortium/resources/resourcecoreh12.shtml>).

\*Spacers (Sp):Sp0, -CH<sub>2</sub>CH<sub>2</sub>NH<sub>2</sub>; Sp8, -CH<sub>2</sub>-CH<sub>2</sub>-CH<sub>2</sub>-NH<sub>2</sub>; Sp9, -CH<sub>2</sub>CH<sub>2</sub>CH<sub>2</sub>CH<sub>2</sub>CH<sub>2</sub>NH<sub>2</sub>; Sp10, -NHCOCH<sub>2</sub>NH; Sp11, -OCH<sub>2</sub>C<sub>6</sub>H<sub>4</sub>-p-NHCOCH<sub>2</sub>NH; Sp12, Asparagine; Sp13, Glycine; Sp14, Threonine; Sp15, Serine; Sp16, -PNP(OC<sub>6</sub>H<sub>4</sub>NH<sub>2</sub>); Sp17, -OCH<sub>2</sub>C<sub>6</sub>H<sub>4</sub>NH<sub>2</sub>; Sp18, -O(CH<sub>2</sub>)<sub>3</sub>NHCO(CH<sub>2</sub>)<sub>5</sub>NH<sub>2</sub>; Sp19, EN (Glutamate, Asparagine) or NK (Asparagine, Lysine); Sp20, GENR (Glycine, Glutamate, Asparagine, Arginine); Sp21, -N(CH<sub>3</sub>)-O-(CH<sub>2</sub>)<sub>2</sub>-NH<sub>2</sub>; Sp22, NST (*N*-glycosylation consensus site: Asparagine, Serine, Threonine). Other linkers: MDPLys,

Mur-L-Ala-D-iGln $\beta$ -(CH<sub>2</sub>)<sub>4</sub>NH<sub>2</sub>; N(LT)AVL, Asparagine(Leucine, Threonine), Alanine, Valine, Leucine; LVNKT, Leucine, Valine, Asparagine, Lysine, Threonine.

### SUPPLEMENTARY REFERENCES

1. Otwinowski, Z., and Minor, W. (1997) *Methods in Enzymology* **276**, 307-326
2. Lee, S., Sawaya, M. R., and Eisenberg, D. (2003) *Acta Crystallogr D Biol Crystallogr* **59**, 2191-2199
3. Vaguine, A. A., Richelle, J., and Wodak, S. J. (1999) *Acta Crystallogr D Biol Crystallogr* **55**, 191-205
4. Yeates, T. O. (1988) *Acta Crystallogr A* **44 ( Pt 2)**, 142-144
5. Vagin, A., and Teplyakov, A. (2000) *Acta Crystallogr D Biol Crystallogr* **56**, 1622-1624
6. Alexeev, D., Zhu, H., Guo, M., Zhong, W., Hunter, D., Yang, W., Campopiano, D., and Sadler, P. J. (2003) *Nature Structural Biology* **10**, 297-302
7. Vagin, A. A., and Isupov, M. N. (2001) *Acta Crystallogr D Biol Crystallogr* **57**, 1451-1456
8. Sullivan, L. C., Clements, C. S., Beddoe, T., Johnson, D., Hoare, H. L., Lin, J., Huyton, T., Hopkins, E. J., Reid, H. H., Wilce, M. C., Kabat, J., Borrego, F., Coligan, J. E., Rossjohn, J., and Brooks, A. G. (2007) *Immunity* **27**, 900-911
9. Long, F., Vagin, A. A., Young, P., and Murshudov, G. N. (2008) *Acta Crystallogr D Biol Crystallogr* **64**, 125-132
10. Watson, A. A., Christou, C. M., James, J. R., Fenton-May, A. E., Moncayo, G. E., Mistry, A. R., Davis, S. J., Gilbert, R. J., Chakera, A., and O'Callaghan, C. A. (2009) *Biochemistry* **48**, 10988-10996
11. O'Callaghan C, A., Byford, M. F., Wyer, J. R., Willcox, B. E., Jakobsen, B. K., McMichael, A. J., and Bell, J. I. (1999) *Anal Biochem* **266**, 9-15
12. Palma, A. S., Feizi, T., Zhang, Y., Stoll, M. S., Lawson, A. M., Diaz-Rodriguez, E., Campanero-Rhodes, M. A., Costa, J., Gordon, S., Brown, G. D., and Chai, W. (2006) *J Biol Chem* **281**, 5771-5779
13. Stoll, M. S., and Feizi, T. (2009) Software tools for storing, processing and displaying carbohydrate microarray data. . in *Beilstein Symposium on Glyco-Bioinformatics* (Kettner, C. ed., Potsdam, Germany
14. Chai, W., Stoll, M. S., Galustian, C., Lawson, A. M., and Feizi, T. (2003) *Methods Enzymol* **362**, 160-195
15. Liu, Y., Feizi, T., Campanero-Rhodes, M. A., Childs, R. A., Zhang, Y., Mulloy, B., Evans, P. G., Osborn, H. M., Otto, D., Crocker, P. R., and Chai, W. (2007) *Chem Biol* **14**, 847-859
